1           **Omicron-specific mRNA vaccine elicits potent immune**  
2           **responses in mice, hamsters, and nonhuman primates**

3

4 Yi Wu,<sup>1,2,7</sup> Yanqiong Shen,<sup>2,7</sup> Namei Wu,<sup>1,2,7</sup> Xinghai Zhang,<sup>3,7</sup> Shaohong Chen,<sup>3,4</sup>  
5 Chang Yang,<sup>1,2</sup> Junhui Zhou,<sup>3,4</sup> Yan Wu,<sup>3</sup> Da Chen,<sup>5</sup> Li Wang,<sup>2</sup> Yuye Wang,<sup>6</sup> Jiejie Xu,<sup>6</sup>  
6 Ke Liu,<sup>6</sup> Chao Wang,<sup>5</sup> Huajun Zhang,<sup>3,\*</sup> Ninuo Xia,<sup>2,\*</sup> Sandra Chiu,<sup>2,\*</sup> and  
7 Yucai Wang<sup>1,2,6,8,\*</sup>

8 <sup>1</sup>Department of Radiology, The First Affiliated Hospital of USTC, Division of Life  
9 Sciences and Medicine, University of Science and Technology of China, Hefei 230001,  
10 P. R. China

11 <sup>2</sup>School of Basic Medical Sciences, Division of Life Sciences and Medicine, University  
12 of Science and Technology of China, Hefei 230027, P. R. China

13 <sup>3</sup>State Key Laboratory of Virology, Wuhan Institute of Virology, Center for Biosafety  
14 Mega-Science, Chinese Academy of Sciences, Wuhan 430062, P. R. China

15 <sup>4</sup>University of Chinese Academy of Sciences, Beijing 100049, P. R. China

16 <sup>5</sup>MOE Key Laboratory for Cellular Dynamics, School of Life Sciences, Division of  
17 Life Sciences and Medicine, University of Science and Technology of China, Hefei  
18 230027, P. R. China

19 <sup>6</sup>RNAIfa Biotech, Hefei 230088, P. R. China

20 <sup>7</sup>These authors contributed equally to this work

21 <sup>8</sup>Lead Contact

22 \*Corresponding author: [hjzhang@wh.iov.cn](mailto:hjzhang@wh.iov.cn) (H.-J.Z.), [nxia007@ustc.edu.cn](mailto:nxia007@ustc.edu.cn) (N.-N.X.),  
23 [qiux@ustc.edu.cn](mailto:qiux@ustc.edu.cn) (S.C.), [yucaiwang@ustc.edu.cn](mailto:yucaiwang@ustc.edu.cn) (Y.-C.W.)

24

25 **ABSTRACT**

26 SARS-CoV-2 has infected more than 400 million people around the globe and caused  
27 millions of deaths. Since its identification in November 2021, Omicron, a highly  
28 transmissible variant, has become the dominant variant in most countries. Omicron's  
29 highly mutated spike protein, the main target of vaccine development, significantly  
30 compromises the immune protection from current vaccination. We develop an mRNA  
31 vaccine (S<sub>Omicron</sub>-6P) based on an Omicron-specific sequence. In mice, S<sub>Omicron</sub>-6P  
32 shows superior neutralizing antibodies inducing abilities to a clinically approved  
33 inactivated virus vaccine, a clinically approved protein subunit vaccine, and an mRNA  
34 vaccine (S<sub>WT</sub>-2P) with the same sequence of BNT162b2 RNA. Significantly, S<sub>Omicron</sub>-  
35 6P induces a 14.4~27.7-fold and a 28.3~50.3-fold increase of neutralizing activity  
36 against the pseudovirus of Omicron and authentic Omicron compared to S<sub>WT</sub>-2P,  
37 respectively. In addition, two doses S<sub>Omicron</sub>-6P significantly protects Syrian hamsters  
38 against challenge with SARS-CoV-2 Omicron variant and elicits high titers of nAbs in  
39 a dose-dependent manner in macaques. Our results suggest that S<sub>Omicron</sub>-6P offers  
40 advantages over current vaccines, and it will be helpful for those with weak immunity.  
41

## 42 INTRODUCTION

43 Severe acute respiratory syndrome coronavirus 2 (SARS-CoV-2) has infected more  
44 than 400 million people around the globe and caused several million deaths (Koh et al.,  
45 2021; Vogel et al., 2021). Since its discovery in November 2021, SARS-CoV-2 variant  
46 B.1.1.529, the World Health Organization (WHO) designation “Omicron”, has quickly  
47 spread and become dominant (Karim and Karim, 2021). The Omicron variant is highly  
48 transmissible and can infect human more quickly than other variants (Suzuki et al.,  
49 2022). Omicron currently represents ~99% of the new infections in the US, Europe, and  
50 other major countries ([www.gisaid.org/hcov19-variants/](http://www.gisaid.org/hcov19-variants/)).

51 The Omicron variant carries approximately 30 mutations, some of which help it to  
52 escape the majority of existing SARS-CoV-2 neutralizing antibodies (nAbs) (Cao et al.,  
53 2021; Dejnirattisai et al., 2022a; Flemming, 2022; Planas et al., 2021). Most spike (S)  
54 protein monoclonal antibodies could no longer neutralize the Omicron variant.  
55 Convalescent individuals previously infected with other variants have little nAbs  
56 against Omicron and can be re-infected (Cele et al., 2021; Sun et al., 2022). Several  
57 studies show that the Omicron variant significantly weakened or knocked out the  
58 protection conferred by two vaccine doses. After a vaccine booster shot, vaccinees’ sera  
59 (post-vaccination sera) show enhanced nAb titers but are still around 20-fold less potent  
60 in neutralizing the Omicron variant than other variants (Hu et al., 2022; Liu et al., 2022;  
61 Planas et al., 2021; VanBlargan et al., 2022).

62 On the bright side, the third dose of current major vaccines significantly reduced  
63 the risk of hospitalization, severe illness, and death caused by Omicron. The Centers

64 for Disease Control and Prevention (CDC) of America reported that a third vaccination  
65 prevented Omicron infected people from emergency room visits or urgent care with 82%  
66 and 90% effectiveness, respectively (Pia and Rowland-Jones, 2022; Thompson et al.,  
67 2021). However, for those with disadvantages, such as old age, pre-existing conditions,  
68 or being vaccinated with less potent vaccines, Omicron still poses a considerable threat.  
69 A recent phase 4 clinical trial in Brazil indicates a significant fraction of people who  
70 received three doses still have Omicron neutralization titers lower or barely above the  
71 limit to be considered seropositive (Malik et al., 2022; Mistry et al., 2021). Thus, an  
72 Omicron effective vaccine is urgently needed. Here we develop an Omicron variant  
73 sequence-based mRNA vaccine which is much more potent in inducing nAbs in  
74 multiple animal models against Omicron challenge than the original wild-type mRNA  
75 vaccine, inactivated virus vaccine, and protein subunit vaccine, and importantly,  
76 provides complete protection in hamster model at the dose as low as 1  $\mu$ g.  
77

## 78 RESULTS

79 For full-length Omicron-specific mRNA vaccine design (named  $S_{\text{Omicron-6P}}$ ), we  
80 adopted the “hexapro” spike protein sequence as the backbone for its enhanced stability  
81 of prefusion conformation and substituted the respective sequences with the Omicron  
82 mutations (Table S1) (Hsieh et al., 2020). Modified Omicron mRNA was synthesized  
83 with high purity through in vitro transcription (Figure S1A). Robust expression of  
84 Omicron spike protein on HEK293T cell surface was detected after transfection with  
85 immunofluorescence (Figure S1B). The mRNA was then encapsulated into even-sized  
86 lipid nanoparticles (LNP) to generate the final vaccine product,  $S_{\text{Omicron-6P}}$ , whose size  
87 is 110 nm on average (Figure S1C). We adopted the BNT162b2 RNA sequence with  
88 the two proline mutations as the control mRNA vaccine ( $S_{\text{WT-2P}}$ ) (Vogel et al., 2021).

89 We first tested the humoral responses to the immunogenicity of the vaccine. Mice  
90 were vaccinated twice and were sacrificed after two doses of  $S_{\text{Omicron-6P}}$  (Figure 1A).  
91 We observed a significant increase in both total B cells ( $\text{CD19}^+$ ) and plasma B cells  
92 ( $\text{CD138}^+\text{B220}^+$ ) in the spleens of  $S_{\text{Omicron-6P}}$  immunized mice (Figure 1B and 1C),  
93 indicating  $S_{\text{Omicron-6P}}$  can induce B cell responses. Then we performed a head-to-head  
94 comparison of  $S_{\text{Omicron-6P}}$  *versus*  $S_{\text{WT-2P}}$ , along with two clinically approved vaccines,  
95 one inactivated virus vaccine, and one protein subunit vaccine, on immunogenicity in  
96 BALB/c mice. Mice were vaccinated twice at various doses of each vaccine, and  
97 antibodies in the sera were measured one week after the second vaccination (Figure  
98 1A). The antigen-specific IgG geometric mean titers (GMTs) were measured against  
99 Omicron Spike trimer protein with ELISA (Figure 1D and S2). Both  $S_{\text{Omicron-6P}}$  and

100  $S_{WT-2P}$  elicited IgG antibodies in a dose-dependent manner. At 5 and 10  $\mu\text{g}$  dose levels,  
101  $S_{\text{Omicron-6P}}$  induced significantly higher IgG than  $S_{WT-2P}$ , by 1.8- and 2.3-fold,  
102 respectively. The entry inhibition by serum of immunized mice was measured in a  
103 neutralization assay using vesicular stomatitis virus (VSV)-based Omicron pseudovirus.  
104 Dramatically but not surprisingly, the  $S_{\text{Omicron-6P}}$  vaccinated mice elicited 14.4~27.8-  
105 fold higher serum neutralizing activity than those by  $S_{WT-2P}$  at all three dose groups  
106 (Figure 1E and S3-S4). Next, 50% virus-neutralization GMTs were measured by an  
107 Omicron-neutralization assay. As expected, 28.3~50.3-fold higher neutralizing titers  
108 were observed from mice immunized with  $S_{\text{Omicron-6P}}$  than those immunized with  $S_{WT-}$   
109 2P, using a plaque reduction neutralization test with authentic Omicron (Figure 1F). By  
110 contrast, two doses of immunization using inactivated virus vaccine or protein subunit  
111 vaccine hardly induced any Omicron nAbs in mice (Figure 1E-1F and S5-S6). These  
112 results suggest that  $S_{\text{Omicron-6P}}$  is potent in inducing Omicron-specific antibodies.

113

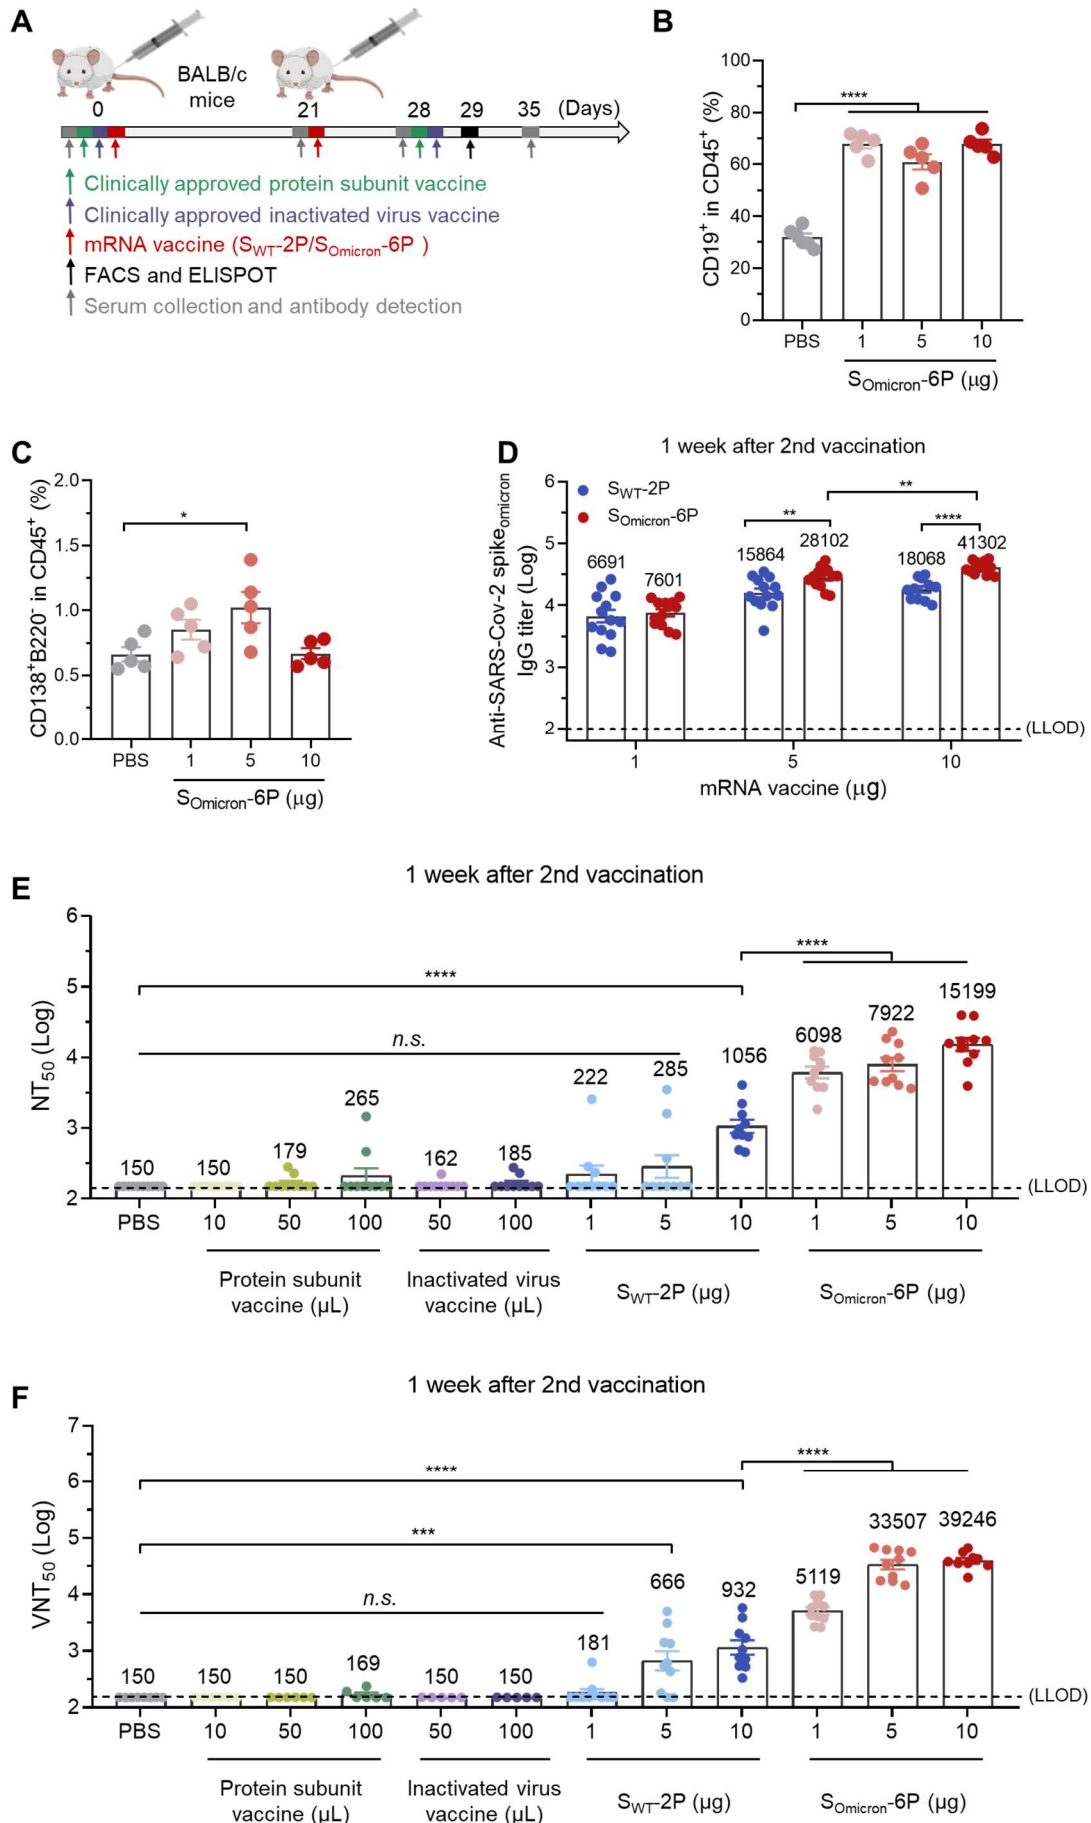

115

116 **Figure 1. S<sub>Omicron</sub>-6P Induces Antigen-Specific Humoral Immune Responses in**  
117 **Mice.**

118 (A) Schematic diagram of immunization and sample collection schedule in mice.  
119 Female BALB/c mice were immunized on a two-dose schedule with S<sub>WT</sub>-2P, S<sub>Omicron</sub>-  
120 6P, protein subunit vaccine using a dimeric form of the receptor-binding domain of  
121 wild-type SARS-CoV-2, or inactivated vaccine of wild-type SARS-CoV-2.

122 (B-C) Percentages of (B) B cells and (C) plasma cells in spleen after immunized with  
123 different doses of S<sub>Omicron</sub>-6P.

124 (D) The Omicron SARS-CoV-2 variant specific IgG antibody titers were determined  
125 by ELISA (lower limit of detection (LLOD) = 100).

126 (E) Neutralization titers (NT<sub>50</sub>) were determined by recombinant vesicular stomatitis  
127 virus (VSV)-based pseudovirus (Omicron variant) neutralization assay (LLOD = 150).

128 (F) SARS-CoV-2 Omicron 50% virus-neutralization titers (VNT<sub>50</sub>) were determined by  
129 a plaque reduction neutralization test (LLOD = 150).

130 Data are shown as mean ± SEM. Significance was calculated using one-way ANOVA  
131 with multiple comparisons tests (*n.s.*, not significant, \**p* < 0.05, \*\**p* < 0.01, \*\*\**p* <  
132 0.001, \*\*\*\**p* < 0.0001)

133

134 We next investigated T cell responses in mice received two doses of S<sub>Omicron</sub>-6P.  
135 For T cell analysis in spleens, although the ratios of CD4<sup>+</sup> and CD8<sup>+</sup> T cells within  
136 CD45<sup>+</sup> leukocytes remain unchanged, S<sub>Omicron</sub>-6P elicited significant increases in  
137 activated CD4<sup>+</sup> (CD69<sup>+</sup>CD4<sup>+</sup>) and CD8<sup>+</sup> (CD69<sup>+</sup>CD8<sup>+</sup>) T cells (Figure 2A, 2B, and  
138 Figure S7). We also noted that cytotoxic CD8<sup>+</sup> T cells (CD107a<sup>+</sup> and Granzyme B<sup>+</sup>),  
139 which play a crucial role in eliminating infected cells, have increased significantly after  
140 vaccination (Figure 2C and 2D). Furthermore, in the spleen of S<sub>Omicron</sub>-6P immunized



141 mice, we observed extensive expansion of the effector memory CD4<sup>+</sup> and CD8<sup>+</sup> T cells  
142 (CD44<sup>+</sup>CD62L<sup>-</sup>), which mediate protective memory (Figure 2E and 2F).

143 Previous data indicate that mRNA vaccines induce T-helper-1 (Th1) -driven CD4<sup>+</sup>  
144 T-cell responses (Laczko et al., 2020; Vogel et al., 2021). To investigate whether our  
145 S<sub>Omicron-6P</sub> activates an immune response similarly, we collected splenocytes from the  
146 immunized mice and re-stimulated them with the full-length S peptide mix. Using an  
147 enzyme-linked immunosorbent spot (ELISPOT) assay, we detected high levels of IFN-  
148  $\gamma$  and interleukin-2 (IL-2) secreting Th1 cells in S<sub>Omicron-6P</sub> immunized mice (Figure  
149 2G and 2H). Nevertheless, no significant difference in T-helper-2 (Th2) cytokines  
150 interleukin-4 (IL-4) secretion was observed between the vaccinated and control mice  
151 (Figure 2I). Intracellular-cytokine-staining flow cytometry had consistent results  
152 (Figure S8). These data confirmed that S<sub>Omicron-6P</sub> induces a Th1-biased immune  
153 response.

154

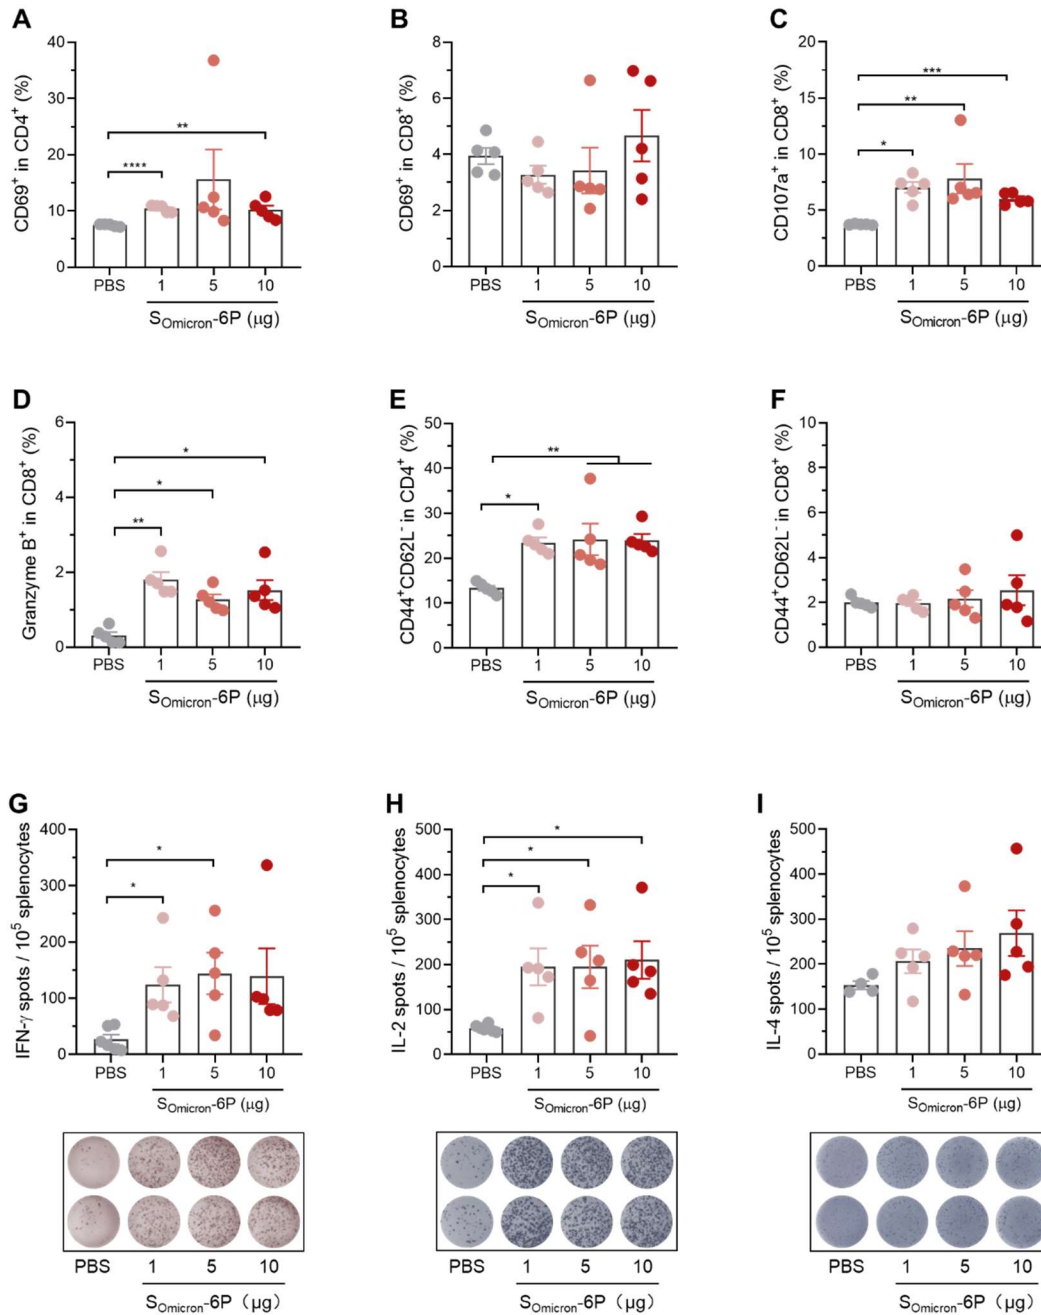

155

156

157 **Figure 2. Somicron-6P Induces Antigen-Specific Cellular Immune Responses in Mice.**

158 Female BALB/c mice were immunized with 0, 1, 5 or 10  $\mu$ g S<sub>Omicron-6P</sub>. Twenty-nine  
 159 days after the first immunization, mice were euthanized and their spleens were collected  
 160 for T cell response and phenotyping analysis.

161 (A-B) The percentages of activated (CD69<sup>+</sup>) (A) CD4<sup>+</sup> and (B) CD8<sup>+</sup> among CD4<sup>+</sup> and  
 162 CD8<sup>+</sup> T cells.

163 (C-D) The percentages of cytotoxic (CD107a<sup>+</sup> and Granzyme B<sup>+</sup>) T cells among CD8<sup>+</sup>

164 T cells.

165 (E-F) The percentages of effector memory (CD44<sup>+</sup>CD62L<sup>-</sup>) cells among (E) CD4<sup>+</sup> and

166 (F) CD8<sup>+</sup> T cells.

167 (G-I) ELISPOT assay for (G) IFN- $\gamma$ , (H) IL-2, and (I) IL-4 in splenocytes. Splenocytes

168 were harvested and re-stimulated with SARS-CoV-2 S protein peptide mix for 24 h on

169 day 29 after first immunization.

170 Data are shown as mean  $\pm$  SEM. Significance was calculated using one-way ANOVA

171 with multiple comparisons tests (\*p < 0.05, \*\*p < 0.01, \*\*\*p < 0.001, \*\*\*\*p < 0.0001)

172

173 The Syrian hamster has been demonstrated as a suitable animal model for SARS-

174 CoV-2 infection (Munoz-Fontela et al., 2020). Five groups of hamsters were vaccinated

175 on day 0 and day 21 with either 1, 10, 25, and 50  $\mu$ g of S<sub>Omicron</sub>-6P or PBS. The hamster

176 sera were collected and evaluated for vaccine immunogenicity on day 14, 21 and 28

177 (Figure 3A). A significant amount of IgG against S protein was detected on day 14 and

178 21 after the first immunization, but no apparent dose-dependency was observed.

179 However, the second dose boosts S antibodies more than ten times one week later (on

180 day 28) (Figure 3B and S9). The pseudovirus assay showed that high neutralizing

181 antibody titers were elicited even by 1  $\mu$ g dose of S<sub>Omicron</sub>-6P (Figure 3C and S10). In

182 line with this, high levels of neutralizing activity against authentic Omicron in S<sub>Omicron</sub>-

183 6P vaccinated animals (Figure 3D). Moreover, we observed a strong correlation of

184 pseudovirus assay with the authentic Omicron neutralization assay, with a correlation

185 co-efficiency of 0.91 (Figure 3E).

186 On day 30, some hamsters were challenged with  $1 \times 10^4$  plaque-forming units

187 (PFU) of authentic Omicron virus via intranasal route and sacrificed 4 days later. As

188 shown in Figure 3F, only a trace amount of viral RNA was detected in the lung tissue  
 189 of vaccinated animals with a little more for the 1  $\mu\text{g}$  group, which is a 4-5 magnitude  
 190 reduction than the control group. Infectious virus in lung tissue was determined with  
 191 plaque assay, resulting in no detectable virus in both lungs and nasal turbinates of all  
 192 vaccinated animals, including the lowest dose group, but while markedly levels of virus  
 193 in the PBS group (Figure 3G). These data demonstrate that  $S_{\text{Omicron-6P}}$  provides robust  
 194 protection against the infection of Omicron.  
 195

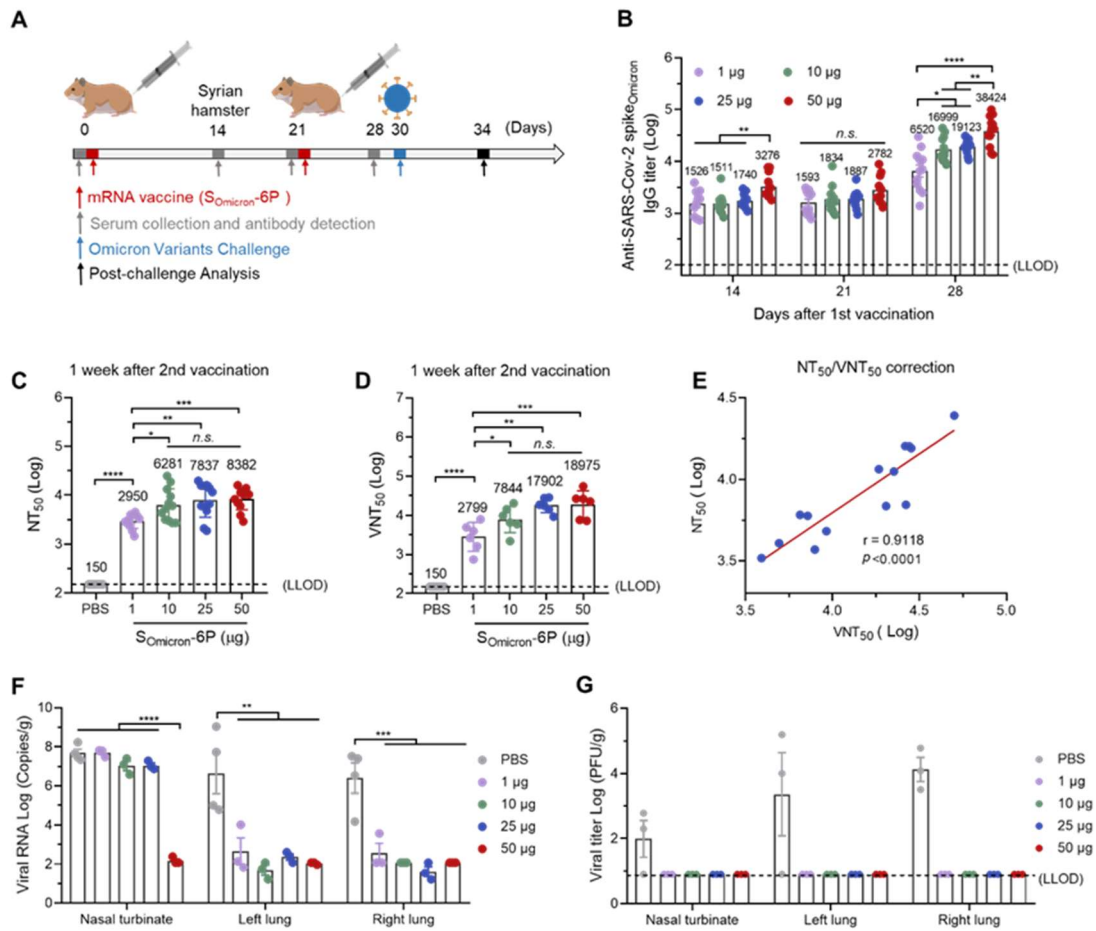

196

197

198 **Figure 3.  $S_{\text{Omicron-6P}}$  Provides Robust Protection against Omicron in Syrian**  
 199 **Hamsters.**

200 (A) Schematic diagram of immunization and sample collection schedule in Syrian

201 hamsters. Female hamsters were prime-vaccinated via the *i.m.* route on day 0 and  
202 boosted on day 21, with 0, 1, 10, 25, or 50  $\mu\text{g}$  of  $S_{\text{Omicron-6P}}$ . On day 30 after the initial  
203 immunization, hamsters were intranasally (*i.n.*) challenged with  $1 \times 10^4$  PFU of SARS-  
204 CoV-2 Omicron. On day 4 after infection, hamsters were euthanized for tissue  
205 collection.

206 (B) The Omicron SARS-CoV-2 variant specific IgG antibody titers were determined by  
207 ELISA (lower limit of detection (LLOD) = 100).

208 (C)  $\text{NT}_{50}$  values were determined by VSV-based pseudovirus (Omicron variant)  
209 neutralization assay (LLOD = 150).

210 (D)  $\text{VNT}_{50}$  values were determined by a plaque reduction neutralization test (LLOD =  
211 150).

212 (E) Pearson correlation of VSV-SARS-CoV-2 (Omicron variant)  $\text{VNT}_{50}$  with live  
213 SARS-CoV-2 (Omicron variant)  $\text{VNT}_{50}$  for  $n = 14$  random selected serum samples from  
214 mice immunized with  $S_{\text{Omicron-6P}}$ .

215 (F) Viral RNA load in the both lungs and nasal turbinates were determined by qRT-PCR.

216 (G) Viral load expressed in PFU per gram of tissue in the both lungs and nasal turbinates  
217 at 4 dpi.

218 Data are shown as mean  $\pm$  SEM. Significance was calculated using one-way ANOVA  
219 with multiple comparisons tests (*n.s.*, not significant, \* $p < 0.05$ , \*\* $p < 0.01$ , \*\*\* $p <$   
220  $0.001$ , \*\*\*\* $p < 0.0001$ ).

221

222 The immunogenicity of  $S_{\text{Omicron-6P}}$  was also evaluated in non-human primates.  
223 Macaques were immunized with either 20 or 100  $\mu\text{g}$  of  $S_{\text{Omicron-6P}}$  twice at a 21-day  
224 interval (Figure 4A). Similar to the results in mice and hamsters, the first immunization  
225 generates some level of IgG and almost no nAbs, with only one macaque producing  
226 little nAbs (Figure 4B-4C and S11-12). However, one week after the second  
227 immunization, all the macaques responded vigorously to the second immunization in

228 one week and kept producing higher nAbs on day 35. Consistent with this, sera of the  
 229 macaques showed vigorous neutralization activity against authentic Omicron on both  
 230 day 28 and 35 (Figure 4D). Finally, we tested whether the nAbs elicited by  $S_{\text{Omicron-6P}}$   
 231 could provide cross-protection against other SARS-CoV-2 variants. Although  $S_{\text{Omicron-6P}}$   
 232 6P vaccinated macaques produced high nAbs against the Omicron variants, we detected  
 233 relatively lower nAbs production against the wild-type, Beta, or Delta variants (Figure  
 234 4E-4G).

235

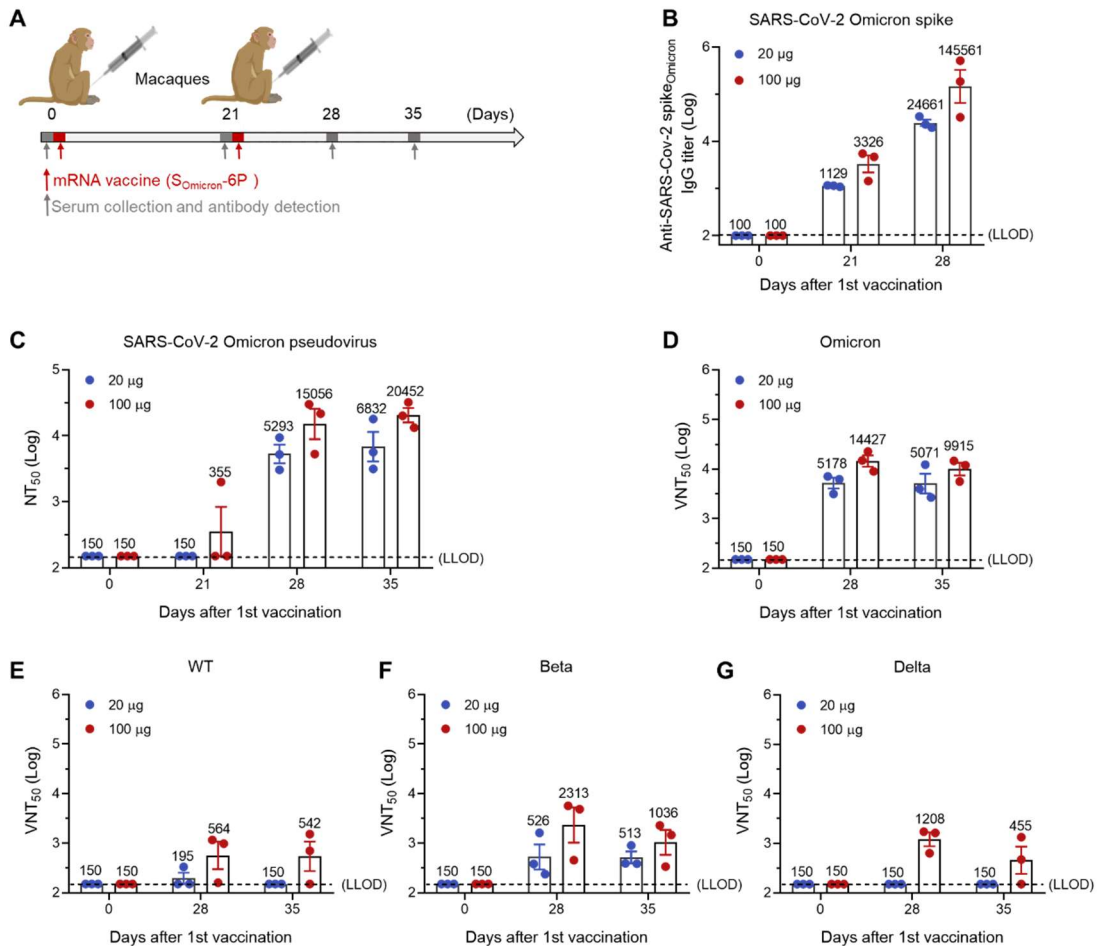

236

237

238 **Figure 4.  $S_{\text{Omicron-6P}}$  Induces Omicron-Specific Immunity in Macaques.**

239 (A) Study design. Male macaques were *i.m.* immunized with 20 or 100  $\mu\text{g}$   $S_{\text{Omicron-6P}}$

240 and boosted with the same dose at 21-day interval.

241 (B) The Omicron SARS-CoV-2 variant specific IgG antibody titers were determined by

242 ELISA (lower limit of detection (LLOD) = 100).

243 (C) NT<sub>50</sub> values were determined by VSV-based pseudovirus (Omicron variant)

244 neutralization assay (LLOD = 150).

245 (D-G) VNT<sub>50</sub> against (D) SARS-CoV-2 Omicron, (E) WT, (F) Beta, and (G) Delta that

246 were determined by a plaque reduction neutralization test (LLOD = 150).

247 Data are shown as mean ± SEM. Significance was calculated using one-way ANOVA

248 with multiple comparisons tests.

249

## 250 **DISCUSSION**

251 Although the fast-spreading Omicron variant seems to cause less severe symptoms, the  
252 death toll keeps rising due to Omicron's high transmissible ability (Garcia-Beltran et  
253 al., 2022). The original forms of mRNA vaccines, which have achieved remarkable  
254 clinical efficacy in protecting against prior variants of SARS-CoV-2, fail to provide as  
255 strong protection against Omicron as before. For example, the mRNA vaccine,  
256 BNT162b2, has over 90% efficacy against the WA1 strain; however, the efficacy  
257 dropped to around 30-50% for Omicron (Dejnirattisai et al., 2022b). The neutralizing  
258 antibody titers evoked by BNT162b2 dropped by 15-20 folds. Therefore, the fast  
259 evolution of the virus compelled us to develop Omicron-specific mRNA vaccines.

260 To generate an Omicron-specific mRNA vaccine, we introduced all the mutations  
261 within the S protein in the mRNA sequence and designed the sequence to express  
262 prefusion S protein *via* six consecutive proline substitutions (S<sub>Omicron</sub>-6P). S<sub>Omicron</sub>-6P  
263 induced a 14.4~27.7-fold and a 28.3~50.3-fold increase of neutralizing activity against  
264 the pseudovirus of Omicron and authentic Omicron compared to S<sub>WT</sub>-2P, respectively.  
265 Assuming that neutralizing antibody titers positively correlate to the protection efficacy,  
266 we anticipate that our Omicron-specific mRNA vaccine would restore its clinical  
267 effectiveness to at least 90%. Both the 6P design and the inclusion of all Omicron-  
268 specific mutations may contribute to the strong immunity evoked by the Omicron-  
269 specific mRNA vaccine.

270 Further immunology analysis indicates that the Omicron-specific mRNA vaccine  
271 induces multicomponent immune responses, including memory B and T cell responses,



272 a Th1-biased T cell immunity, and a cytotoxic T cell response. The induction of immune  
273 response is similar to the prior version of mRNA vaccines, suggesting that changes in  
274 mRNA sequence do not alter the generic mechanisms of how mRNA-LNP-based  
275 vaccines activate cellular immunity.

276 In this study, we have conducted a comprehensive analysis of the effects of the  
277 Omicron-specific mRNA vaccine using several animal models, including mice, Syrian  
278 hamsters, and macaques. All the tested animals developed strong immune responses  
279 and were well protected from developing disease against Omicron virus challenge in  
280 hamsters. We noticed that in Syrian hamster model, only the highest dose of vaccines  
281 shows effective reduction of RNA copies in the nasal turbinate where SARS-COV2  
282 replicates the most on day 4. In addition, no live Omicron virus was detected in nasal  
283 turbinates of all the S<sub>Omicron</sub>-6P-vaccinated hamsters. Note that we infected the animals  
284 by directly adding the Omicron viruses into the nasal cavity, and it may take a more  
285 extended period for the viral RNAs to degrade.

286 Most importantly, our data strongly suggest that two doses of Omicron-specific  
287 mRNA vaccine provide enhanced protection against Omicron compared with two doses  
288 of the prior version of mRNA vaccines with a booster. We note that several preprint  
289 studies published on bioRxiv indicate that the Omicron-specific booster offered no  
290 better protection against the Omicron variant than the S<sub>WT</sub>-2P booster (Ying et al., 2022).  
291 Note that the experimental settings of our study are different from these studies. We  
292 compare the immune protection effect against Omicron between Omicron-specific  
293 mRNA vaccines and wild type mRNA vaccines on naïve animals that have not been

294 exposed to any of the prior vaccines. Our data provide strong evidence to show that  
295 Omicron-specific mRNA vaccines elicit enhanced protection for naïve animals. We  
296 think that highly the mutated S protein of Omicron has significantly compromised the  
297 immune memories induced by the prior version of vaccines so that a single dose of a  
298 booster, no matter Omicron-specific or not, is not potent enough to elicit immune  
299 protection effectively. Based on the results from our study, we urge that those with  
300 weaker immune systems should get at least two doses of Omicron-specific mRNA  
301 vaccines instead of getting a booster in addition to two doses of vaccines against prior  
302 SARS-CoV-2 variants. Furthermore, our data also suggest that Omicron-specific  
303 vaccines show considerable cross-protection against Beta variants, but lower protection  
304 against wild type and Delta variant. This also urges the necessity for development of  
305 multi-valent vaccine to fight against the evolution of SARS-CoV-2.  
306

307 **ACKNOWLEDGMENTS**

308 This work was supported by the National Key R&D Program of China  
309 (2020YFA0710700), the National Natural Science Foundation of China (52025036,  
310 51961145109), the Fundamental Research Fund for the Central Universities  
311 (WK9100000014, WK2480000006), and the project of collaborative innovation for  
312 colleges of Anhui province (NO. GXXT-2021-070). This work was partially carried out  
313 at the USTC Center for Micro and Nanoscale Research and Fabrication. We thank Jia  
314 Wu, Jun Liu and Hao Tang from Wuhan Institute of Virology for managing of BSL-3  
315 facility, where all the authentic SARS-CoV-2 experiments were conducted. We also  
316 thank National Virus Resource Center for providing the Omicron variant (CCPM-B-V-  
317 049-2112-18). We thank Weiheng Chen from the Animal Facility of USTC, where the  
318 mice, hamsters, and macaques were vaccinated. We thank the Joint Laboratory of  
319 Innovation in Life Sciences University of Science and Technology of China (USTC)  
320 and Changchun Zhuoyi Biological Co. Ltd.  
321

322 **AUTHOR CONTRIBUTIONS**

323 C. W., N.-N.X., Y.-C.W., and S.C. supervised the project. Yi W., Y.-Q.S., N.-M.W., Y.-  
324 C.W., and S.C. conceived the experiments. Yi W., Y.-Q.S., N.-M.W., X.-H.Z., S.-H.C.,  
325 C.Y., H.-J.Z., Yan W., D.C., L.W., Y.-Y.W., J.-J.X., K.L. conducted the experiments and  
326 analyzed the data. Yi W., Y.-Q.S., N.-M.W., N.-N.X., and Y.-C.W. wrote and revised the  
327 manuscript. C. W., H.-J.Z., and S.C. revised the manuscript. Y.-Y.W., J.-J.X., and K.L.  
328 are employees of Hefei RNAIfa Biotech. All authors read and approved the manuscript.  
329

330 **DECLARATION OF INTERESTS**

331 N.-N.X., Y.-C.W. are co-inventors on pending patent applications related to the  
332 Omicron mRNA vaccine. The other authors declare no known competing financial  
333 interests or personal relationships that could have appeared to influence the work  
334 reported in this paper.

335

336 **REFERENCES**

- 337 Cao, Y., Wang, J., Jian, F., Xiao, T., Song, W., Yisimayi, A., Huang, W., Li, Q., Wang,  
338 P., An, R., *et al.* (2021). Omicron escapes the majority of existing SARS-CoV-2  
339 neutralizing antibodies. *Nature* *602*, 657-663.
- 340 Cele, S., Jackson, L., Khoury, D.S., Khan, K., Moyo-Gwete, T., Tegally, H., San, J.E.,  
341 Cromer, D., Scheepers, C., Amoako, D.G., *et al.* (2021). Omicron extensively but  
342 incompletely escapes Pfizer BNT162b2 neutralization. *Nature* *602*, 654-656
- 343 Dejnirattisai, W., Huo, J., Zhou, D., Zahradnik, J., Supasa, P., Liu, C., Duyvesteyn,  
344 H.M.E., Ginn, H.M., Mentzer, A.J., Tuekprakhon, A., *et al.* (2022a). SARS-CoV-2  
345 Omicron-B.1.1.529 leads to widespread escape from neutralizing antibody responses.  
346 *Cell* *185*, 467-484 e415.
- 347 Dejnirattisai, W., Shaw, R.H., Supasa, P., Liu, C., Stuart, A.S.V., Pollard, A.J., Liu, X.X.,  
348 Lambe, T., Crook, D., Stuart, D.I., *et al.* (2022b). Reduced neutralisation of SARS-  
349 CoV-2 omicron B.1.1.529 variant by post-immunisation serum. *Lancet* *399*, 234-236.
- 350 Feng, L., Wang, Q., Shan, C., Yang, C., Feng, Y., Wu, J., Liu, X., Zhou, Y., Jiang, R.,  
351 Hu, P., *et al.* (2020). An adenovirus-vectored COVID-19 vaccine confers protection  
352 from SARS-COV-2 challenge in rhesus macaques. *Nat. Commun.* *11*, 4207.
- 353 Flemming, A. (2022). Omicron, the great escape artist. *Nat. Rev. Immunol.* *22*, 75.
- 354 Garcia-Beltran, W.F., St Denis, K.J., Hoelzemer, A., Lam, E.C., Nitido, A.D., Sheehan,  
355 M.L., Berrios, C., Ofoman, O., Chang, C.C., Hauser, B.M., *et al.* (2022). mRNA-based  
356 COVID-19 vaccine boosters induce neutralizing immunity against SARS-CoV-2  
357 Omicron variant. *Cell* *185*, 457-466 e454.
- 358 Hsieh, C.L., Goldsmith, J.A., Schaub, J.M., DiVenere, A.M., Kuo, H.C., Javanmardi,  
359 K., Le, K.C., Wrapp, D., Lee, A.G., Liu, Y., *et al.* (2020). Structure-based design of  
360 prefusion-stabilized SARS-CoV-2 spikes. *Science* *369*, 1501-1505.
- 361 Hu, J., Peng, P., Cao, X., Wu, K., Chen, J., Wang, K., Tang, N., and Huang, A.L. (2022).  
362 Increased immune escape of the new SARS-CoV-2 variant of concern Omicron. *Cell*.  
363 *Mol. Immunol.* *19*, 293-295.
- 364 Karim, S.S.A., and Karim, Q.A. (2021). Omicron SARS-CoV-2 variant: a new chapter  
365 in the COVID-19 pandemic. *Lancet* *398*, 2126-2128.
- 366 Koh, H.K., Geller, A.C., and VanderWeele, T.J. (2021). Deaths from COVID-19. *JAMA*  
367 *325*, 133-134.
- 368 Laczko, D., Hogan, M.J., Toulmin, S.A., Hicks, P., Lederer, K., Gaudette, B.T., Castano,  
369 D., Amanat, F., Muramatsu, H., Oguin, T.H., 3rd, *et al.* (2020). A single immunization  
370 with nucleoside-modified mRNA vaccines elicits strong cellular and humoral immune  
371 responses against SARS-CoV-2 in mice. *Immunity* *53*, 724-732 e727.
- 372 Liu, J., Chandrashekar, A., Sellers, D., Barrett, J., Jacob-Dolan, C., Lifton, M.,

- 373 McMahan, K., Sciacca, M., VanWyk, H., Wu, C., *et al.* (2022). Vaccines elicit highly  
374 conserved cellular immunity to SARS-CoV-2 Omicron. *Nature*. Published online  
375 January 31, 2022. <https://doi.org/10.1038/s41586-022-04465-y>.
- 376 Maier, M.A., Jayaraman, M., Matsuda, S., Liu, J., Barros, S., Querbes, W., Tam, Y.K.,  
377 Ansell, S.M., Kumar, V., Qin, J., *et al.* (2013). Biodegradable lipids enabling rapidly  
378 eliminated lipid nanoparticles for systemic delivery of RNAi therapeutics. *Mol. Ther.*  
379 *21*, 1570-1578.
- 380 Malik, J.A., Ahmed, S., Mir, A., Shinde, M., Bender, O., Alshammari, F., Ansari, M.,  
381 and Anwar, S. (2022). The SARS-CoV-2 mutations versus vaccine effectiveness: New  
382 opportunities to new challenges. *J. Infect. Public Health* *15*, 228-240.
- 383 Mistry, P., Barmania, F., Mellet, J., Peta, K., Strydom, A., Viljoen, I.M., James, W.,  
384 Gordon, S., and Pepper, M.S. (2021). SARS-CoV-2 variants, vaccines, and host  
385 immunity. *Front Immunol.* *12*, 809244.
- 386 Munoz-Fontela, C., Dowling, W.E., Funnell, S.G.P., Gsell, P.S., Riveros-Balta, A.X.,  
387 Albrecht, R.A., Andersen, H., Baric, R.S., Carroll, M.W., Cavaleri, M., *et al.* (2020).  
388 Animal models for COVID-19. *Nature* *586*, 509-515.
- 389 Pia, L., and Rowland-Jones, S. (2022). Omicron entry route. *Nat. Rev. Immunol.*  
390 Published online January 26, 2022. <https://doi.org/10.1038/s41577-022-00681-9>.
- 391 Planas, D., Saunders, N., Maes, P., Guivel-Benhassine, F., Planchais, C., Buchrieser, J.,  
392 Bolland, W.H., Porrot, F., Staropoli, I., Lemoine, F., *et al.* (2021). Considerable escape  
393 of SARS-CoV-2 Omicron to antibody neutralization. *Nature* *602*, 671-675.
- 394 Sun, C., Kang, Y.F., Liu, Y.T., Kong, X.W., Xu, H.Q., Xiong, D., Xie, C., Liu, Y.H.,  
395 Peng, S., Feng, G.K., *et al.* (2022). Parallel profiling of antigenicity alteration and  
396 immune escape of SARS-CoV-2 Omicron and other variants. *Signal Transduct. Target.*  
397 *Ther.* *7*, 42.
- 398 Suzuki, R., Yamasoba, D., Kimura, I., Wang, L., Kishimoto, M., Ito, J., Morioka, Y.,  
399 Nao, N., Nasser, H., Uriu, K., *et al.* (2022). Attenuated fusogenicity and pathogenicity  
400 of SARS-CoV-2 Omicron variant. *Nature*. Published online February 1, 2022.  
401 <https://doi.org/10.1038/s41586-022-04462-1>.
- 402 Thompson, M.G., Stenehjem, E., Grannis, S., Ball, S.W., Naleway, A.L., Ong, T.C.,  
403 DeSilva, M.B., Natarajan, K., Bozio, C.H., Lewis, N., *et al.* (2021). Effectiveness of  
404 Covid-19 vaccines in ambulatory and inpatient care settings. *N. Engl. J. Med.* *385*,  
405 1355-1371.
- 406 VanBlargan, L.A., Errico, J.M., Halfmann, P.J., Zost, S.J., Crowe, J.E., Jr., Purcell, L.A.,  
407 Kawaoka, Y., Corti, D., Fremont, D.H., and Diamond, M.S. (2022). An infectious  
408 SARS-CoV-2 B.1.1.529 Omicron virus escapes neutralization by therapeutic  
409 monoclonal antibodies. *Nat. Med.* Published online January 19, 2022. <https://doi.org/10.1038/s41591-021-01678-y>.
- 411 Vogel, A.B., Kanevsky, I., Che, Y., Swanson, K.A., Muik, A., Vormehr, M., Kranz, L.M.,

412 Walzer, K.C., Hein, S., Guler, A., *et al.* (2021). BNT162b vaccines protect rhesus  
413 macaques from SARS-CoV-2. *Nature* 592, 283-289.

414 Wang, Z.J., Zhang, H.J., Lu, J., Xu, K.W., Peng, C., Guo, J., Gao, X.X., Wan, X., Wang,  
415 W.H., Shan, C., *et al.* (2020). Low toxicity and high immunogenicity of an inactivated  
416 vaccine candidate against COVID-19 in different animal models. *Emerg. Microbes*  
417 *Infect.* 9, 2606-2618.

418 Ying, B., Scheaffer, S.M., Whitener, B., Liang, C.Y., Dmytrenko, O., Mackin, S., Wu,  
419 K., Lee, D., Avena, L.E., Chong, Z., *et al.* (2022). Boosting with Omicron-matched or  
420 historical mRNA vaccines increases neutralizing antibody responses and protection  
421 against B.1.1.529 infection in mice. *bioRxiv.* [https://doi.](https://doi.org/10.1101/2022.02.07.479419)  
422 [org/10.1101/2022.02.07.479419](https://doi.org/10.1101/2022.02.07.479419).

423 Zhang, Q., Zhang, H., Gao, J., Huang, K., Yang, Y., Hui, X., He, X., Li, C., Gong, W.,  
424 Zhang, Y., *et al.* (2020). A serological survey of SARS-CoV-2 in cat in Wuhan. *Emerg.*  
425 *Microbes Infect.* 9, 2013-2019.

426

427



428 **KEY RESOURCES TABLE**

429

| <b>REAGENT or RESOURCE</b>                                   | <b>SOURCE</b>  | <b>IDENTIFIER</b>              |
|--------------------------------------------------------------|----------------|--------------------------------|
| <b>Antibodies</b>                                            |                |                                |
| APC/Cyanine7 anti-mouse CD45 Antibody                        | Biolegend      | Cat#103116; RRID: AB_312981    |
| PE/Cyanine7 anti-mouse CD4 Antibody                          | Biolegend      | Cat#100528; RRID: AB_312729    |
| PerCP/Cyanine5.5 anti-mouse CD8a Antibody                    | Biolegend      | Cat#100734; RRID: AB_2075238   |
| PE anti-mouse IL-4 Antibody                                  | Biolegend      | Cat#504104; RRID: AB_315318    |
| APC anti-mouse IL-2 Antibody                                 | Biolegend      | Cat#503810; RRID: AB_315304    |
| FITC anti-human/mouse Granzyme B Recombinant Antibody        | Biolegend      | Cat#372206; RRID: AB_2687030   |
| PE anti-mouse IFN- $\gamma$ Antibody                         | Biolegend      | Cat#505808; RRID: AB_315402    |
| APC anti-mouse TNF- $\alpha$ Antibody                        | Biolegend      | Cat#506308; RRID: AB_315429    |
| APC anti-mouse CD4 Antibody                                  | Biolegend      | Cat#100516; RRID: AB_312719    |
| PE anti-mouse CD8a Antibody                                  | Biolegend      | Cat#100708; RRID: AB_312747    |
| PerCP/Cyanine5.5 anti-mouse/human CD44 Antibody              | Biolegend      | Cat#103032; RRID: AB_2076204   |
| Brilliant Violet 510 <sup>TM</sup> anti-mouse CD62L Antibody | Biolegend      | Cat#104441; RRID: AB_2561537   |
| FITC anti-mouse CD107a (LAMP-1) Antibody                     | Biolegend      | Cat#121606; RRID: AB_572007    |
| PE/Cyanine7 anti-mouse CD69 Antibody                         | Biolegend      | Cat#104512; RRID: AB_493564    |
| FITC anti-mouse CD45.2 Antibody                              | Biolegend      | Cat#109806; RRID: AB_313443    |
| APC/Cyanine7 anti-mouse CD19 Antibody                        | Biolegend      | Cat#115530; RRID: AB_830707    |
| APC anti-mouse CD138 (Syndecan-1) Antibody                   | Biolegend      | Cat#142506; RRID: AB_10962911  |
| APC anti-mouse CD185 (CXCR5) Antibody                        | Biolegend      | Cat#145506; RRID: AB_2561970   |
| PE anti-mouse/human CD45R/B220 Antibody                      | Biolegend      | Cat#103208; RRID: AB_312993    |
| HRP-conjugated Goat anti-Mouse IgG                           | Sangon Biotech | Cat#D110087                    |
| Goat anti-Monkey IgG (H&L)                                   | Thermo Fisher  | Cat#PA1-84631; RRID: AB_933605 |

|                                                           |           |                 |  |                              |
|-----------------------------------------------------------|-----------|-----------------|--|------------------------------|
| Secondary Antibody, HRP                                   |           |                 |  |                              |
| Goat anti-Syrian Hamster IgG H&L (HRP)                    |           | Abcam           |  | Cat#ab6892; RRID: AB_955427  |
| SARS-CoV-2 (2019-nCoV) Spike Neutralizing Antibody        |           | Sino Biological |  | Cat#40592-R0004              |
| Purified Rat anti-Mouse CD16/CD32                         |           | BD Biosciences  |  | Cat# 553142; RRID: AB_394657 |
| Goat anti-Rabbit IgG (FITC)                               |           | Abcam           |  | Cat#ab6717; RRID: AB_955238  |
| <b>Virus Strains</b>                                      |           |                 |  |                              |
| SARS-CoV-2-Fluc pseudovirus                               | B.1.1.529 | Vazyme Biotech  |  | Cat#DD1568-03                |
| SARS-CoV-2 WIV04 strain                                   |           | N/A             |  | N/A                          |
| SARS-CoV-2 Beta variant                                   |           | N/A             |  | N/A                          |
| SARS-CoV-2 Delta variant                                  |           | N/A             |  | N/A                          |
| SARS-CoV-2 Omicron variant                                |           | N/A             |  | N/A                          |
| <b>Chemicals, Peptides, and Recombinant Proteins</b>      |           |                 |  |                              |
| SARS-CoV-2 (Omicron) S1 + S2 trimer Protein               | B.1.1.529 | Sino Biological |  | Cat#40589-V08H26             |
| SARS-CoV-2 Spike Peptide Pool                             |           | Sino Biological |  | Cat#PP003                    |
| eBioscience™ Cell Stimulation Cocktail (500 ×)            |           | Invitrogen      |  | Cat#00-4970                  |
| Foxp3/Transcription Staining Buffer Set                   | Factor    | Invitrogen      |  | Cat#00-5523-00               |
| Lipofectamine® MessengerMAX™ Reagent                      |           | Invitrogen      |  | Cat#LMRNA008                 |
| Penicillin Streptomycin                                   |           | Gibco           |  | Cat#15140                    |
| Fetal Bovine Serum                                        |           | ExCell Bio      |  | Cat#FSP500                   |
| Dulbecco's modified eagle medium (DMEM)                   |           | Gibco           |  | Cat#C11995500BT              |
| RPMI Medium 1640                                          |           | Gibco           |  | Cat#C11875500BT              |
| DAPI                                                      |           | Sigma-Aldrich   |  | Cat#28718-90-3               |
| Non-Fat Powdered Milk                                     |           | Sangon Biotech  |  | Cat#A600669-0250             |
| Bio-Lite Luciferase Assay System                          |           | Vazyme Biotech  |  | Cat#DD1201-01/02/03          |
| eBioscience™ Protein Transport Inhibitor Cocktail (500 ×) |           | Invitrogen      |  | Cat#00-4980                  |
| ACK Lysis Buffer                                          |           | Beyotime        |  | Cat#3702                     |
| TMB Substrate Solution                                    |           | Beyotime        |  | Cat#P0209                    |
| Stop Solution for TMB Substrate                           |           | Beyotime        |  | Cat#P0215                    |
| <b>Critical Commercial Assays</b>                         |           |                 |  |                              |
| Mouse IL-4 ELISPOT <sup>PLUS</sup> Kit                    |           | MabTech         |  | Cat#3311-4HPW                |
| Mouse IL-2 ELISPOT <sup>PLUS</sup> Kit                    |           | MabTech         |  | Cat#3441-4HPW                |

|                                           |                                     |              |
|-------------------------------------------|-------------------------------------|--------------|
| Mouse IFN- $\gamma$ Precoated ELISPOT Kit | Dakewe Biotech                      | Cat#2210005  |
| <b>Cell Lines</b>                         |                                     |              |
| Vero cells                                | Provided by Vazyme Biotech          | N/A          |
| Vero E6 cells                             | ATCC                                | Cat#CRL-1586 |
| HEK293T cells                             | ATCC                                | Cat#CRL11268 |
| <b>Animals</b>                            |                                     |              |
| BALB/c mice                               | Jiangsu GemPharmatech               | N/A          |
| Syrian hamster                            | Beijing Vital River                 | N/A          |
| Macaques                                  | Anhui Deze Macaque breeding Co. LTD | N/A          |
| <b>Software and Algorithms</b>            |                                     |              |
| GraphPad prism                            | GraphPad software                   | N/A          |
| ImageJ                                    | NIH software                        | N/A          |
| FlowJo software                           | FlowJo software                     | N/A          |

430

431

432

## 433 **EXPERIMENTAL MODEL AND SUBJECT DETAILS**

### 434 **Ethics statement**

435 All mouse and macaque studies were conducted under protocols approved by the  
436 Institutional Animal Care and Use Committee of the University of Science and  
437 Technology of China. All procedures performed on Syrian hamster were in accordance  
438 with regulations and established guidelines, and were reviewed and approved by the  
439 Animal Ethics Committee of the Wuhan Institute of Biological Products (WIBP)  
440 (WIBP-AII382020001). The animals received care in compliance with the guidelines  
441 outlined in the Guide for the Care and Use of Laboratory Animals.

442

443 **Cells and viruses**

444 HEK293T cells, Vero cells, and Vero E6 cells were cultured in Dulbecco's modified  
445 Eagle's medium (DMEM, Gibco) supplemented with 10% fetal bovine serum (FBS,  
446 ExCell Bio) and 1% penicillin-streptomycin (Gibco) at 37°C under a 5% CO<sub>2</sub>  
447 atmosphere. The SARS-CoV-2 WIV04 strain was initially isolated from a COVID-19  
448 patient in 2019 (GISAID, accession no. EPI\_ISL\_402124); Beta variant  
449 (NPRC2.062100001) was kindly provided by Chinese Center for Disease Control and  
450 Prevention, and Delta variant (B.1.617.2; GWHBEBW01000000) by Prof. Hongping  
451 Wei; Omicron variant was isolated from a throat swab of a patient from Hong Kong by  
452 the Institute of Laboratory Animal Sciences, Chinese Academy of Medical Sciences  
453 (CCPM-B-V-049-2112-18). All processes in this study involving authentic SARS-CoV-  
454 2 were performed in a BSL-3 facility.

455

456 **METHOD DETAILS**

457 **mRNA design and synthesis**

458 Spike (S) protein encoded by S<sub>WT-2P</sub> vaccine was designed from original ancestral  
459 SARS-CoV-2 WA1 (GenBank MN908947.3), S<sub>Omicron-6P</sub> was based on a background  
460 of S sequences from SARS-CoV-2 variant Omicron (B.1.1.529) (GISAID: GR/484A).  
461 The template for the S<sub>WT-2P</sub> mRNA is a DNA fragment encoding SARS-CoV-2 S with  
462 K986P and V987P substitutions. The template for the S<sub>Omicron-6P</sub> mRNA is a DNA  
463 fragment encoding Omicron variant S with F817P, A892P, A899P, A942P, K986P, and  
464 V987P substitutions. Both mRNAs were synthesized in vitro using an optimized T7

465 RNA polymerase-mediated transcription reaction with complete replacement of uridine  
466 by N1-methyl-pseudouridine. The reaction included a DNA template containing the  
467 open reading frame flanked by 5' untranslated region (UTR) and 3' UTR sequences and  
468 was terminated by an encoded poly A tail.

469 The mRNA was purified by oligo-dT affinity purification, buffer exchanged by  
470 tangential flow filtration into sodium acetate, and sterile filtered. RNA integrity was  
471 assessed by microfluidic capillary electrophoresis (Fragment Analyzer systems 5200,  
472 Agilent), and the concentration, pH, residual DNA, proteins, and dsRNA impurities of  
473 the solution were determined. The mRNA 5' capping efficiency and 3'-polyadenosine  
474 (poly A) tail of mRNAs was studied using liquid chromatography coupled to mass  
475 spectrometry (LC-MS).

476

#### 477 **mRNA vaccine production**

478 mRNAs were encapsulated in LNPs using a modified procedure of a method previously  
479 as previously described (Maier et al., 2013) wherein an ethanolic lipid mixture of  
480 ionizable cationic lipid, phosphatidylcholine, cholesterol, and polyethylene glycol-lipid  
481 was rapidly mixed with an aqueous solution containing mRNA. The drug product  
482 underwent analytical characterization, which included the determination of particle size  
483 and polydispersity, encapsulation, pH, endotoxin, and bioburden, and the material was  
484 deemed acceptable for in vivo study.

485

#### 486 **mRNA transfection**

487 HEK293T were seeded in 24-well plates at  $1.5 \times 10^4$  cells/well. After 12 h, the cells  
488 were transfected with S<sub>Omicron</sub>-6P mRNA using Lipofectamine<sup>®</sup> Messenger MAX<sup>™</sup>  
489 Reagent (Invitrogen). And 6 h later, the medium was replaced with DMEM medium  
490 (Gibco).

491

#### 492 **Vaccine antigen detection by immunofluorescence**

493 Transfected HEK293T cells were fixed in 4% paraformaldehyde (PFA) and  
494 permeabilized in PBS/0.1% Triton X-100. Free binding sites were blocked with 1%  
495 BSA for 0.5 h at room temperature. Then cells were incubated with SARS-CoV-2 S  
496 neutralizing antibody (Sino Biological, 40592-R0004) that recognizes Omicron S  
497 protein. The cells were stained with an anti-rabbit fluorescent IgG secondary antibody,  
498 and nucleus DNA was stained with DAPI (Sigma-Aldrich). Images were acquired with  
499 a laser scanning confocal microscope (Nikon A1).

500

#### 501 **Mouse immunizations**

502 Female BALB/c mice (8–12 weeks old) were randomly allocated to groups. For S<sub>WT</sub>-  
503 2P and S<sub>Omicron</sub>-6P mRNA groups, the mice were immunized intramuscularly with 1, 5,  
504 and 10 µg of mRNA vaccine, respectively. For clinically approved inactivated vaccines,  
505 the mice were intramuscularly (*i.m.*) immunized with 50 µL and 100 µL of the vaccine  
506 (500 µL/vial for an adult), respectively. For clinically approved protein subunit vaccine,  
507 mice were *i.m.* immunized with 10, 50, and 100 µL of the vaccine (500 µL/vial for an  
508 adult), respectively. Mice were immunized with the same dose at 21-day intervals for

509 mRNA vaccines or 28-day intervals for inactivated vaccine or protein subunit vaccine.

510 Sera were collected on day 0, 21, 28, and 35 after the first immunization to detect

511 SARS-CoV-2 Omicron variant-specific IgG and nAbs titers as described below.

512 Spleens of mice receiving different vaccines were collected on day 29 post the first

513 immunization to evaluate immune responses by ELISPOT and flow cytometry as

514 described below.

515

### 516 **Hamster immunization and challenge experiments**

517 Four groups of female Syrian hamsters (6–10 weeks old) were vaccinated with 1, 10,

518 25, 50  $\mu\text{g}$  of  $S_{\text{Omicron-6P}}$  for prime-boost vaccine regimens. PBS *i.m.* immunization

519 served as control. Formulations were administered by intramuscular injection to each

520 hind leg. On day 21, all groups received their second vaccine dose. On day 30, groups

521 of 5 female Syrian hamsters were challenged *i.n.* with  $1 \times 10^4$  PFU of the Omicron

522 variants per animal after anesthetization with isoflurane. The SARS-CoV-2 Omicron

523 virus was isolated from a patient's throat swab of from Hong Kong by the Institute of

524 Laboratory Animal Sciences, Chinese Academy of Medical Sciences (CCPM-B-V-049-

525 2112-18). All processes in this study involving authentic SARS-CoV-2 were performed

526 in a BSL-3 facility. Throughout the study, hamsters were monitored daily for weight

527 changes.

528

### 529 **Macaque immunizations**

530 Male macaques (3–5 years old) were randomly assigned to receive  $S_{\text{Omicron-6P}}$  (20 or

531 100 µg) on day 0 (the day for the first vaccination) and 21. The vaccine was  
532 administered *i.m.* injection in the quadriceps muscle. Blood was collected on day 0, 21,  
533 28, and 35 after the first immunization to detect Omicron variant S protein-specific IgG  
534 and nAbs as described below.

535

### 536 **Enzyme linked immunosorbent assay (ELISA)**

537 Nunc Maxisorp ELISA plates (ThermoFisher) were coated with 100 ng per well of  
538 SARS-CoV-2 B.1.1.529 (Omicron) S1 + S2 trimer protein (Sino Biological) in PBS  
539 overnight at 4°C. The coated plates were washed 4 times with PBS and blocked with  
540 5% skim milk powder in PBST (0.1% Tween-20 in PBS) for 2 h. After blocks, plates  
541 were incubated with serial dilutions of heat-inactivated sera in blocking buffer for 1 h  
542 at room temperature, followed by 4 washes. HRP-conjugated secondary antibody was  
543 diluted 1:10,000 in blocking buffer and incubated for 1 hour, followed by 4 washes.  
544 TMB (Beyotime) substrate was added and reacted under dark for 8 minutes. The  
545 absorbance was measured at 450 nm using a SpectraMax iD5 microplate reader.

546

### 547 **Pseudovirus neutralization assays**

548 A recombinant vesicular stomatitis virus (VSV)-based pseudovirus neutralization assay  
549 was used to measure neutralizing antibodies. The SARS-CoV-2-Fluc B.1.1.529  
550 pseudovirus (Vazyme Biotech, DD1568-03) was used. In brief, pseudovirus carrying a  
551 luciferase reporter and encapsulated in Omicron variant S proteins were incubated with  
552 six 4-fold serial dilutions of the heat-inactivated serum samples by DMEM (Gibco) for



553 1 h at 37°C. The mixture was then added to the Vero cells culture (Vazyme Biotech) in  
554 96-well plates with DMEM /10% FBS/1% penicillin-streptomycin and incubated in a  
555 humidified cell culture chamber at 37°C with 5% CO<sub>2</sub> for 24 hours. The medium was  
556 removed at the end of incubation, and 100 µL one-step luciferase detection reagent  
557 (Vazyme Biotech, DD1201-03) was added to each well. Luminescence in relative light  
558 units (RLUs) was measured by a luminometer (SpectraMax iD5, Molecular Devices)  
559 after 3 minutes of incubation at room temperature. Serum samples may be diluted to  
560 meet the initial volume requirement. RLUs of sample wells were normalized with  
561 positive control wells, and NT<sub>50</sub> was calculated as EC<sub>50</sub> by a normalized four-  
562 parameter sigmoid curve fit with constrains of EC<sub>50</sub> > 0 and hillslope > 0 in Prism 8.0  
563 (GraphPad).

564

#### 565 **Plaque reduction neutralization assay**

566 The plaque reduction neutralization assay was carried out as described before (Wang et  
567 al., 2020). Sera were inactivated at 56°C for 30 min before use. The sera were diluted  
568 150-fold first, and then 3-fold serial dilutions were prepared in the maintenance medium.  
569 The virus suspension (0.25 mL, 600 PFU/mL) was mixed with an equal volume of  
570 antiserum at desirable dilution and incubated for 1 h. The mixture was added to  
571 monolayer cells in 24-well plates and incubated for 1 h. After removing of the mixture,  
572 2 mL of maintenance medium containing 0.9% of methylcellulose were added to each  
573 well. The plates were incubated in a 5% CO<sub>2</sub>-air incubator at 37°C for 3–4 days. The  
574 neutralizing titer was calculated as reciprocal of the highest sera dilution suppressing

575 50% of plaque forming. Plaque reduction nAb titer (VNT<sub>50</sub>, 95% CI, challenge viruses  
576 used: 30–300 PFU/well) was calculated as the “inhibitor vs normalized response  
577 (Variable slope)” model in the GraphPad Prism 8.0 software.

578

### 579 **Flow cytometry**

580 Sample processing: spleens were collected in PBS and homogenized through a 70 µm  
581 cell strainer using the stern end of a syringe plunger. Splenocytes were incubated in  
582 ACK lysis buffer to remove red blood cells, then passed through a 40 µm strainer to  
583 obtain a single-cell suspension.

584 Cell activation analysis: after preparing spleen single-cell suspensions, cells were  
585 immediately analyzed for activation markers. Cells were blocked by Fc-receptor  
586 blockade with anti-CD16/CD32 (BD Biosciences), and then stained for 30 minutes at  
587 4°C with the following antibody panel each diluted in PBS: APC/Cyanine7 anti-mouse  
588 CD45 antibody (Biolegend) or FITC anti-mouse CD45.2 antibody (Biolegend), APC  
589 anti-mouse CD4 antibody (Biolegend), APC/Cyanine7 anti-mouse CD19 antibody  
590 (Biolegend), PE anti-mouse CD8a antibody (Biolegend) or PE anti-mouse/human  
591 CD45R/B220 antibody (Biolegend), PerCP/Cyanine5.5 anti-mouse/human CD44  
592 antibody (Biolegend), APC anti-mouse CD138 (Syndecan-1) antibody (Biolegend),  
593 Brilliant Violet 510™ anti-mouse CD62L antibody (Biolegend), FITC anti-mouse  
594 CD107a (LAMP-1) antibody (Biolegend), APC/Cyanine7 anti-mouse CD19 antibody  
595 (Biolegend). Samples were analyzed on the CytoFLEX LX flow cytometer (Beckman  
596 Coulter).

597 Intracellular cytokine staining: to measure antigen-specific T cells, spleen cells  
598 were stimulated with the full-length S peptide mix (Sino Biological) and eBioscience™  
599 protein transport inhibitor cocktail (Invitrogen) at 37°C, 5% CO<sub>2</sub>. RPMI medium 1640  
600 served as a negative control and the combination of eBioscience™ cell stimulation  
601 cocktail (Invitrogen) and eBioscience™ protein transport inhibitor cocktail (Invitrogen)  
602 served as a positive control. Then samples were blocked by anti-CD16/CD32 blockade  
603 as above, stained for 30 minutes at 4°C with the following antibody: APC/Cyanine7  
604 anti-mouse CD45 antibody (Biolegend), PE/Cyanine7 anti-mouse CD4 antibody  
605 (Biolegend), PerCP/Cyanine5.5 anti-mouse CD8a antibody (Biolegend). Cells were  
606 washed and fixed and permeabilized using Foxp3/Transcription factor staining buffer  
607 set (Invitrogen), and stained intracellularly for 30 minutes in PBS with antibodies  
608 including: PE anti-mouse IL-4 antibody (Biolegend) or PE anti-mouse IFN-γ antibody  
609 (Biolegend), APC anti-mouse IL-2 antibody (Biolegend) and FITC anti-human/mouse  
610 Granzyme B recombinant antibody (Biolegend). Samples were analyzed on the  
611 CytoFLEX LX flow cytometer (Beckman Coulter).

612

### 613 **ELISPOT**

614 IL-4 and IL-2 ELISPOT assays were performed with mouse IL-4 ELISPOT<sup>PLUS</sup> kits  
615 and mouse IL-2 ELISPOT<sup>PLUS</sup> kits according to the manufacturer's instructions  
616 (Mabtech). IFN-γ ELISPOT assays were performed with mouse IFN-γ Precoated  
617 ELISPOT kits according to the manufacturer's instructions (Dakewe Biotech). Briefly,  
618 a total of  $5 \times 10^5$  splenocytes in a volume of 200 μL was stimulated with the full-length

619 S peptide mix (Sino Biological) (0.1 µg/mL final concentration per peptide). After  
620 incubation at 37°C, 5% CO<sub>2</sub> for 18 h, the plates were washed, and biotinylated anti-  
621 mouse IFN-γ, IL-2, or IL-4 antibody was added to each well, following incubation of  
622 detection second antibodies. The air-dried plates were read using the automated  
623 ELISPOT reader (Mabtech IRIS FluoroSpot/ELISpot reader) for calculating spot-  
624 forming cells.

625

#### 626 **Analysis of viral load by RT-qPCR**

627 Viral RNA in lung tissues from challenged hamsters was quantified by one-step real-  
628 time RT-PCR as described before (Feng et al., 2020). Briefly, viral RNA was purified  
629 using the QIAamp Viral RNA Mini Kit (Qiagen), and quantified with HiScript® II One  
630 Step qRT-PCR SYBR® Green Kit (Vazyme Biotech) with the primers ORF1ab-F (5'-  
631 CCCTGTGGGTTTTACTTAA-3') and ORF1ab-R (5'-  
632 ACGATTGTGCATCAGCTGA-3'). The amplification procedure was set up as: 50°C  
633 for 3 min, 95°C for 30 s followed by 40 cycles consisting of 95°C for 10 s, 60°C for 30  
634 s.

635

#### 636 **Analysis of viral load by plaque assay**

637 Virus titer was determined with plaque assay as previously described with slight  
638 modification (Zhang et al., 2020). Briefly, virus samples were serially 10-fold diluted  
639 with DMEM with 2.5% FBS, and inoculated to Vero cells or Vero E6 seeded overnight  
640 at  $1.5 \times 10^5$  /well in 24-well plates; after incubated at 37°C for 1 h, the inoculate was

641 replaced with DMEM containing 2.5% FBS and 0.9% carboxymethyl-cellulose. The  
642 plates were fixed with 8% paraformaldehyde and stained with 0.5% crystal violet 3  
643 days later. Virus titer was calculated with the dilution gradient with 10~100 plaques.  
644 Plaque assays were performed in a BSL3 facility with strict adherence to institutional  
645 regulations.  
646

647 **QUANTIFICATION AND STATISTICAL ANALYSIS**

648 All data were analyzed with GraphPad Prism 8.0 software. No statistical methods were  
649 used to predetermine sample size, unless indicated. Unless specified, data are presented  
650 as mean  $\pm$  SEM in all experiments. Analysis of variance (ANOVA) or t-test was used  
651 to determine statistical significance among different groups (\*p < 0.05; \*\*p < 0.01;  
652 \*\*\*p < 0.001; \*\*\*\*p < 0.0001).

653

654 **SUPPLYMENTARY TABLES AND FIGURES**

655 **Table S1**

656 **Amino Acid Sequence Alignment of the Full S Protein of S<sub>omicron</sub>-6P.**

657 MFVFLVLLPLVSSQCVNLTTRTQLPPAYTNSFTRGVYYPDKVFRSSVLHSTQDL  
658 FLPPFSNVTWFHVISGTNGTKRFDNPVLPFNDGVYFASIEKSNIIRGWIFGTLLD  
659 SKTQSLIVNNATNVVIKVCEFQFCNDPFLDHKNNKSWMESEFRVYSSANNC  
660 TFEYVSQPFLMDLEGKQGNFKNLREFVFKNIDGYFKIYSKHTPIIVRDLPGQFS  
661 ALEPLVDLPIGINITRFQTLALHRSYLT PGDSSSGWTAGAAAYYVGYLQPRTF  
662 LLKYNENGTITDAVDCALDPLSETKCTLSFTVEKGIYQTSNFRVQPTESIVRF  
663 PNITNLCPFDEVFNATRFASVYAWNRKRISNCVADYSVLYNLAPFFTFKCYGVS  
664 PTKLNDLCFTNVYADSFVIRGDEV RQIAPGQTGNIADYNYKLPDDFTGCVIAW  
665 NSNKLDSKVS GNYNYLYRLFRKSNLKPFERDISTEIQAGNKPCNGVAGFNCY  
666 FPLRSYSFRPTYGVGHQP YRVVLSFELLHAPATVCGPKKSTNLVKNKCVNFN  
667 FNGLKGTGVLTESNKKFLPFQ QFGRDIADTTDAVRDPQTLEILDITPCSF GGVS  
668 VITPGTNTSNQVAVLYQGVNCTEVPVAIHADQLTPTWRVYSTGSNVFQTRAGC  
669 LIGAEYVNNSYECDIPIGAGICASYQTQTKSHRRARSVASQSIIAYTMSLGAEN  
670 SVAYSNNSIAIPTNFTISVTTEILPVSMTKTSVDCTMYICGDSTECSNLLLQYGS  
671 FCTQLKRALTGIAVEQDKNTQE VFAQVKQIYKTPPIKYFGGFNFSQILPDPSKPS  
672 KRSPIEDLLFNKVTLADAGFIKQYGDCLGDIAARDLICAQKFKGLTVLPPLTD  
673 EMIAQYTSALLAGTITSGWTFGAGPALQIPFPMQMAYRFNGIGVTQNVLYENQ  
674 KLIANQFN SAIGKIQDSL SSTPSALGKLQDVVNHNAQALNTLVKQLSSKFGAIS  
675 SVLNDIFSRLDPPEAEVQIDRLITGRLQSLQTYVTQQLIRAAEIRASANLAATK  
676 MSECVLGQSKRVDFCGKGYHLMSFPQSAPHGVVFLHVTYVPAQEKNFTTAPA  
677 ICHDGKAHFPREGVFVSNGTHWFVTQRNFYEPQIITDNTFVSGNCDVVIGIV  
678 NNTVYDPLQPELDSFKEELDKYFKNHTSPDVDLGDISGINASVVNIQKEIDRL  
679 NEVAKNLNESLIDLQELGKYEQYIKWPWYIWLGFIAGLIAIVMVTIMLCCMTS  
680 CCCLKGCCSCGSCCKFDEDDSEPV LKGVKLHYT  
681

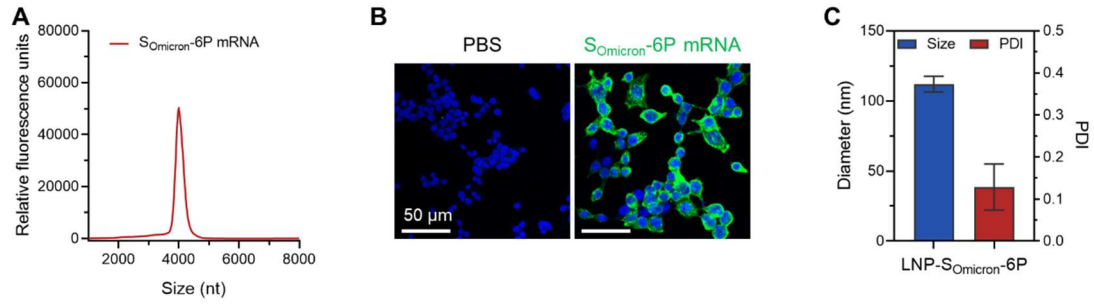

682

683 **Figure S1. SARS-CoV-2 Omicron mRNA Vaccine Design and Characterization,**  
684 **Related to Figures 1-4**

685 (A) Liquid capillary electropherograms of in vitro-transcribed S<sub>Omicron-6P</sub> mRNA.

686 Peaks represent individual samples merged into one graph.

687 (B) Immunofluorescence analysis of the expression of Omicron spike protein in  
688 HEK293T cells.

689 (C) Sizes and polydispersity index (PDI) values of lipid nanoparticles (LNP)  
690 encapsulated with S<sub>Omicron-6P</sub> mRNA. Data are shown as mean  $\pm$  SD.

691



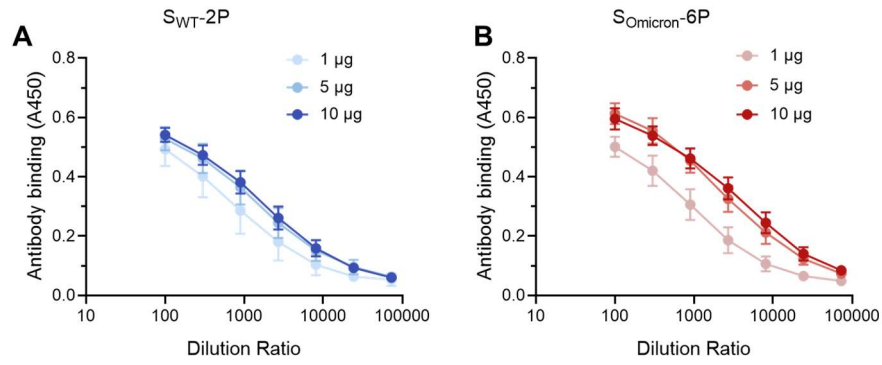

692

693 **Figure S2.  $S_{Omicron-6P}$  or  $S_{WT-2P}$  Elicited Binding Antibodies in Mice, Related to**

694 **Figure 1**

695 (A-B) ELISA binding curves of (A)  $S_{WT-2P}$  or (B)  $S_{Omicron-6P}$  induced binding  
696 antibodies in mouse sera.

697

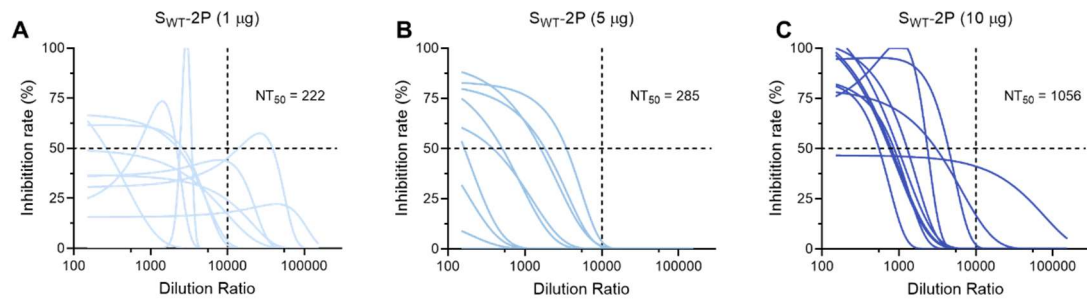

698

699 **Figure S3. SWT-2P Induced Low Levels of nAbs Against SARS-CoV-2 Omicron**  
700 **Variant in Mice, Related to Figure 1**

701 (A-C) Neutralization curves of (A) 1, (B) 5, and (C) 10 µg SWT-2P induced antibodies  
702 against pseudotyped and replication-deficient SARS-CoV-2 Omicron.  
703

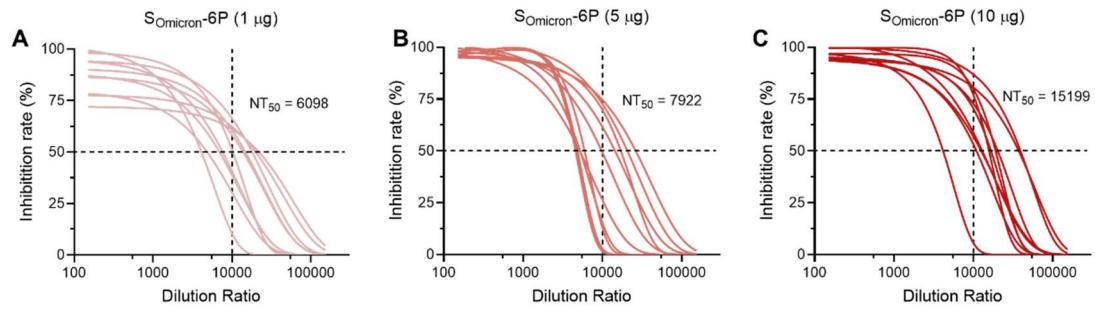

704

705 **Figure S4. S<sub>Omicron-6P</sub> Induced High Levels of nAbs Against SARS-CoV-2 Omicron**

706 **Variant in Mice, Related to Figure 1**

707 (A-C) Neutralization curves of (A) 1, (B) 5, and (C) 10 µg S<sub>Omicron-6P</sub> induced

708 antibodies against pseudotyped and replication-deficient SARS-CoV-2 Omicron.

709

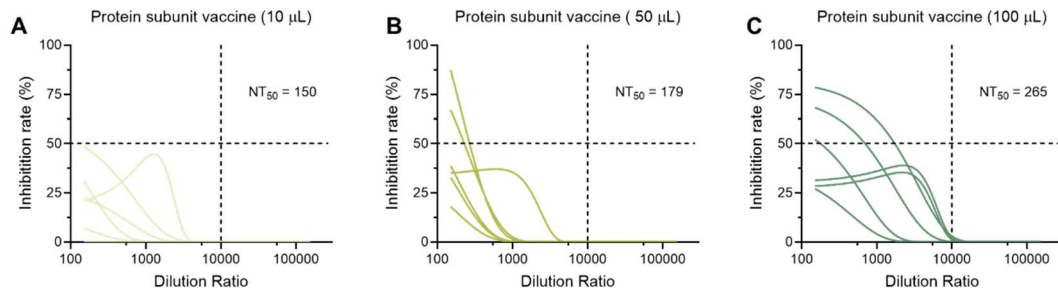

710

711 **Figure S5. Clinically Approved Protein Subunit Vaccine Rarely Induced nAbs**  
712 **Against SARS-CoV-2 Omicron Variant in Mice, Related to Figure 1**

713 (A-C) Neutralization curves of (A) 10, (B) 50, and (C) 100 µL protein subunit vaccine  
714 (500 µL/vial for an adult) induced antibodies against pseudotyped and replication-  
715 deficient SARS-CoV-2 Omicron.

716

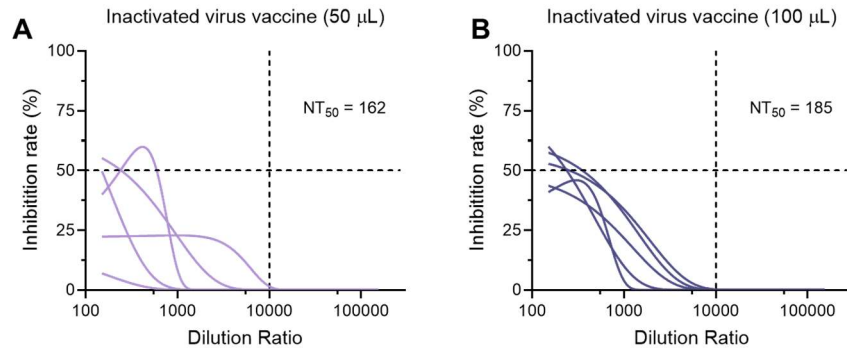

717

718 **Figure S6. Clinically Approved Inactivated Virus Vaccine Rarely Induced nAbs**  
719 **Against SARS-CoV-2 Omicron Variant in Mice, Related to Figure 1**

720 (A-B) Neutralization curves of (A) 50, and (B) 100 µL inactivated virus vaccine (500  
721 µL/vial for an adult) induced antibodies against pseudotyped and replication-deficient  
722 SARS-CoV-2 Omicron.

723

724

725

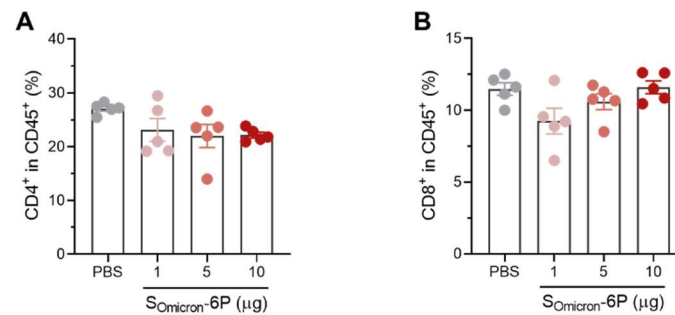

726

727 **Figure S7. The Percentages of CD4<sup>+</sup> and CD8<sup>+</sup> T Cells Among Lymphocytes in**  
728 **Spleen, Related to Figure 2**

729 Female BALB/c mice were immunized with 0, 1, 5 or 10 µg S<sub>Omicron-6P</sub>. Twenty-nine  
730 days after the first immunization, mice were euthanized and their spleens were collected  
731 for T cell response and phenotyping analysis.

732 (A-B) The percentages of (A) CD4<sup>+</sup> and (B) CD8<sup>+</sup> T cells among lymphocytes in spleen.

733

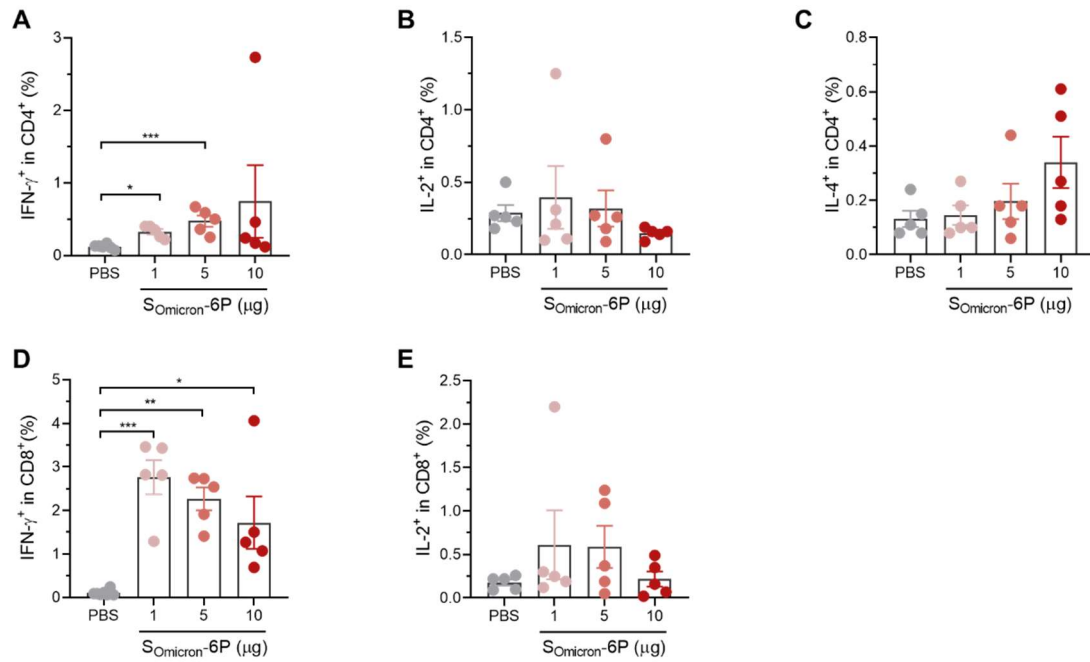

734

735 **Figure S8. T Cell Intracellular-Cytokine Analysis of Somicron-6P Immunized Mice,**  
736 **Related to Figure 2**

737 Splenocytes of mice receiving different immunizations were ex vivo re-stimulated with  
738 full-length S peptide mix or cell culture medium. Flow cytometry analysis of the  
739 percentages of IFN- $\gamma$ <sup>+</sup>, IL-2<sup>+</sup>, and IL-4<sup>+</sup> among CD4<sup>+</sup> and CD8<sup>+</sup> T cells.

740 (A-C) Flow cytometry analysis of the percentages of (A) IFN- $\gamma$ <sup>+</sup>, (B) IL-2<sup>+</sup>, and (C) IL-  
741 4<sup>+</sup> among CD4<sup>+</sup> T cells.

742 (D-E) The percentages of (D) IFN- $\gamma$ <sup>+</sup>, and (E) IL-2<sup>+</sup> among CD8<sup>+</sup> T cells.

743 Data are shown as mean  $\pm$  SEM. Significance was calculated using one-way ANOVA  
744 with multiple comparisons tests (\* $p$  < 0.05, \*\* $p$  < 0.01, \*\*\* $p$  < 0.001)

745

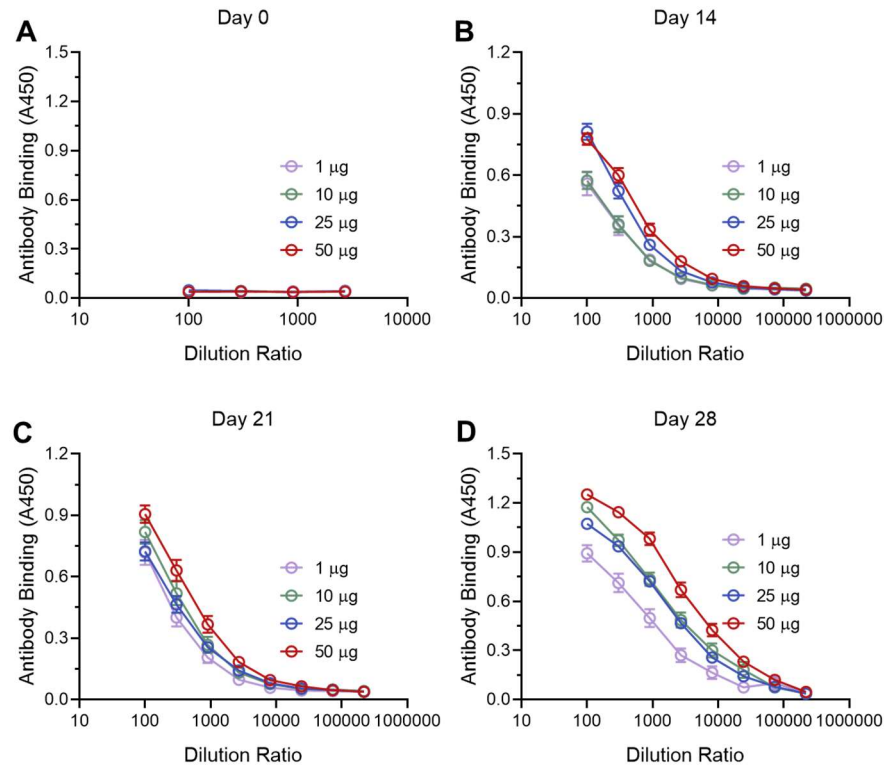

746

747

748 **Figure S9. Somicron-6P Elicited Binding Antibodies in Hamsters, Related to Figure**  
749 **3**

750 (A-D) ELISA binding curves of S<sub>omicron-6P</sub> induced antibodies in hamster sera on (A)

751 day 0, (B) day 14, (C) day 21, and (D) day 28.

752



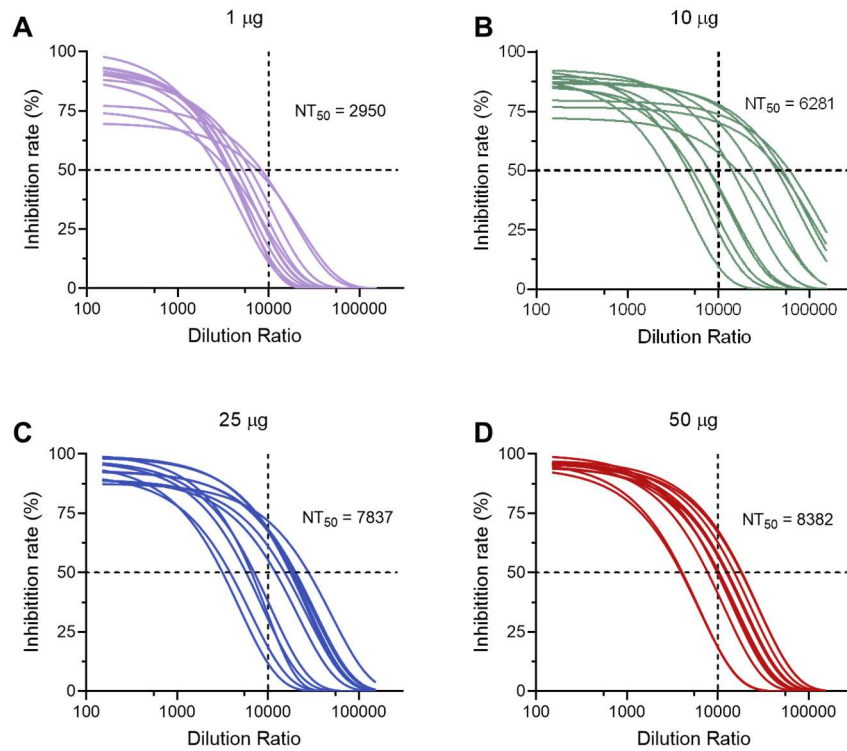

753

754 **Figure S10. S<sub>omicron-6P</sub> Induced High Levels of nAbs Against SARS-CoV-2**  
755 **Omicron Variant in Hamsters, Related to Figure 3**

756 (A-D) Neutralization curves of (A) 1, (B) 10, (C) 25, and (D) 50 μg S<sub>omicron-6P</sub> induced  
757 antibodies against pseudotyped and replication-deficient SARS-CoV-2 Omicron at 1  
758 week after second vaccination.

759

760

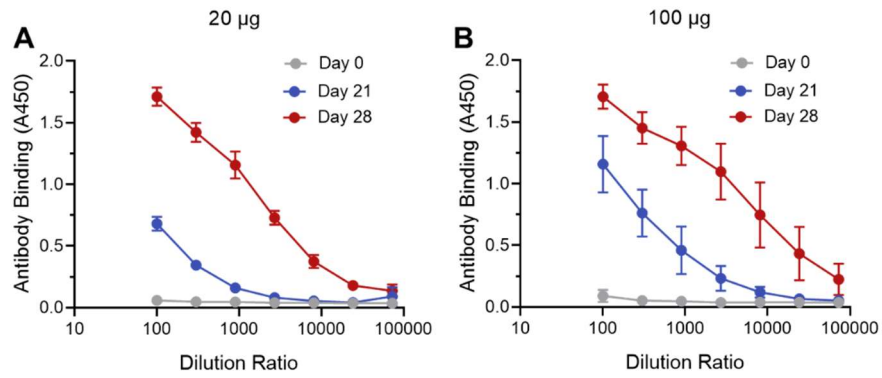

761

762 **Figure S11. Somicron-6P Elicited Binding Antibodies in Macaques, Related to Figure**  
763 **4**

764 (A-B) ELISA binding curves of (A) 20 and (B) 100 µg Somicron-6P induced antibodies  
765 in macaque sera on day 0, 21, 28 after the first immunization.

766

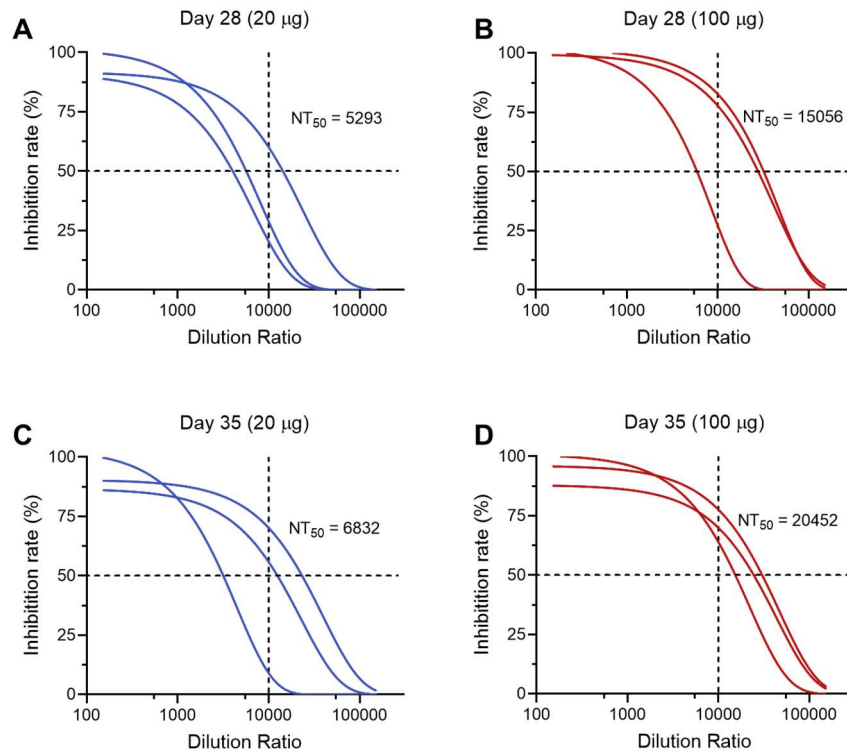

767

768 **Figure S12. S<sub>omicron-6P</sub> Induced High Levels of nAbs Against SARS-CoV-2**  
769 **Omicron Variant in Macaques, Related to Figure 4**

770 (A-D) Neutralization curves of S<sub>omicron-6P</sub> induced antibodies against pseudotyped and  
771 replication-deficient SARS-CoV-2 Omicron (A and B) 1 week and (C and D) 2 weeks  
772 after the second vaccination.
